1 **Title:**

2 **Integrative cross-species analyses identify deficits in habituation learning as a widely**  
3 **affected mechanism in Autism**

4 **Short title:**

5 **Habituation deficits in Autism models**

6 **Authors:**

7 Michaela Fenckova<sup>1</sup>, Lenke Aszталos<sup>2,3</sup>, Pavel Cizek<sup>4</sup>, Euginia L. Singgih<sup>1,5</sup>, Laura E.R. Blok<sup>1</sup>, Jeffrey C.  
8 Glennon<sup>5</sup>, Joanna IntHout<sup>6</sup>, Christiane Zweier<sup>7</sup>, Evan E. Eichler<sup>8,9</sup>, Raphael A. Bernier<sup>10</sup>, Zoltan Aszталos<sup>2,3,11</sup>,  
9 Annette Schenck<sup>1,\*</sup>

10

11 **Affiliations:**

12 <sup>1</sup>Department of Human Genetics, Donders Institute for Brain, Cognition and Behaviour, Radboud  
13 university medical center, 6525 GA, Nijmegen, the Netherlands

14 <sup>2</sup>Aktogen Ltd., Department of Genetics, University of Cambridge, CB2 3EH, Cambridge, United  
15 Kingdom

16 <sup>3</sup>Aktogen Hungary Ltd., Bay Zoltán Nonprofit Ltd. for Applied Research, Institute for Biotechnology  
17 (BAY-BIO), H-6726, Szeged, Hungary

18 <sup>4</sup>Centre for Molecular and Biomolecular Informatics, Radboud Institute for Molecular Life Sciences,  
19 Radboud university medical center, Nijmegen, 6525 GA, the Netherlands

20 <sup>5</sup>Department of Cognitive Neuroscience, Donders Institute for Brain, Cognition and Behaviour,  
21 Radboud university medical center, 6525 EN, Nijmegen, the Netherlands

22 <sup>6</sup>Department for Health Evidence, Radboud university medical center, 6525 EZ, Nijmegen, The  
23 Netherlands

24 <sup>7</sup>Institute of Human Genetics, Friedrich-Alexander-Universität Erlangen-Nürnberg, 91054, Erlangen,  
25 Germany

26 <sup>8</sup>Department of Genome Sciences, University of Washington School of Medicine, Seattle, WA 98195,  
27 USA

28 <sup>9</sup>Howard Hughes Medical Institute, University of Washington, Seattle, WA 98195, USA

29 <sup>10</sup>Department of Psychiatry and Behavioral Sciences, University of Washington, Seattle, WA 98105,  
30 USA

31 <sup>11</sup>Institute of Biochemistry, Biological Research Centre, Hungarian Academy of Sciences, H-6726,  
32 Szeged, Hungary

33

34 **\*Corresponding author:**

35 Annette Schenck

36 Radboudumc

37 Dept. of Human Genetics

38 Geert Groteplein 10

39 6525 GA, Nijmegen

40 The Netherlands

41 [Annette.Schenck@radboudumc.nl](mailto:Annette.Schenck@radboudumc.nl)

42 Tel: +31243610868

43

44

45

46

47

48

49

50

51

52 **Keywords:**

53 Habituation learning, Intellectual Disability, Autism Spectrum Disorder, *Drosophila*, Ras-MAPK,

54 GABAergic neurons

55

56 Number of words in abstract: 245

57 Number of words in the article body: 3995

58 Number of figures: 7

59 Number of tables: 0

60 Number of supplemental files: 2

61 **Abstract:**

62 Background: Although habituation is one of the most ancient and fundamental forms of learning, its  
63 regulators and relevance for human disease are poorly understood.

64 Methods: We manipulated the orthologs of 286 genes implicated in intellectual disability (ID) with or  
65 without comorbid autism spectrum disorder (ASD) specifically in *Drosophila* neurons, and tested  
66 these models in light-off jump habituation. We dissected neuronal substrates underlying the  
67 identified habituation deficits and integrated genotype-phenotype annotations, gene ontologies and  
68 interaction networks to determine the clinical features and molecular processes that are associated  
69 with habituation deficits.

70 Results: We identified more than 100 genes required for habituation learning. For the vast majority  
71 of these, 93 genes, a role in habituation learning was previously unknown. These genes characterize  
72 ID disorders with overgrowth/macrocephaly and comorbid ASD. Moreover, ASD individuals from the  
73 Simons Simplex Collection carrying disruptive *de novo* mutations in these genes exhibit increased  
74 rates of specific aberrant behaviors including stereotypic speech, hyperactivity and irritability. At the  
75 molecular level, ID genes required for normal habituation are enriched in synaptic function and  
76 converge on Ras-MAPK signaling. Both increased Ras-MAPK signaling in GABAergic and decreased  
77 Ras-MAPK signaling in cholinergic neurons specifically inhibit the adaptive habituation response.

78 Conclusions: Our work demonstrates the relevance of habituation learning to autism, identifies an  
79 unprecedented number of novel habituation players, supports an emerging role for inhibitory  
80 neurons in habituation and reveals an opposing, circuit-level-based mechanism for Ras-MAPK  
81 signaling. This establishes habituation as a possible, widely applicable target for pharmacologic  
82 intervention in ID/ASD.

83

84 **Introduction:**

85 Habituation is one of the most ancient and fundamental forms of learning, conserved across the  
86 animal kingdom (1). It causes an organism's initial response to repeated not meaningful stimuli to  
87 gradually decline. Learning to ignore irrelevant stimuli as a result of habituation is thought to  
88 represent a filter mechanism that prevents information overload, allow for selective attention, and  
89 thus to focus cognitive resources on relevant matters. Habituation learning has been proposed to  
90 represent an important element and prerequisite for higher cognitive functions (2–4). In line with  
91 this, habituation in infants correlates better than other measures with later cognitive abilities (5).  
92 Habituation has also emerged as a good proxy for synaptic plasticity (6). However, key players and  
93 molecular mechanisms underlying habituation are poorly understood (7).

94 In humans, deficits in habituation have been reported in a number of neuropsychiatric and  
95 behavioral disorders. In particular, defective cortical filtering of sensory stimuli and information  
96 overload, as expected to arise from habituation deficits, are thought to represent a critical  
97 mechanism underlying autism spectrum disorder (ASD) (8, 9). Indeed, a decreased ability to  
98 habituate has been described in a fraction of ASD individuals (10–12), but has not been connected  
99 yet to specific genetic defects, with a single exception. Recently, two independent studies  
100 demonstrated habituation deficits in patients with Fragile X syndrome, the most common monogenic  
101 cause of intellectual disability (ID) and ASD (13, 14), confirming previously reported habituation  
102 deficits in *Fmr1* KO mice (15, 16). Habituation deficits have also been reported in a limited number of  
103 other ID/ASD disease models (17–20).

104 We apply light-off jump habituation in *Drosophila* to increase our knowledge on the genetic  
105 control of habituation and, at the same time, to assess the relevance of decreased habituation in ID  
106 and in comorbid ASD disorders. *Drosophila* is a well-established model for ID (21–23) and offers  
107 genome-wide resources to study gene function in large scale (24, 25). Several forms of habituation  
108 have been established in *Drosophila* (26–30). Deficits in light-off jump habituation have already been  
109 reported in several ID models (22, 31–35) and in classical learning and memory mutants (27, 30).

110 Moreover, this form of habituation can be assessed in a high-throughput manner. In the light-off  
111 jump paradigm, the initial jump response to repeated light-off stimuli gradually wanes, as has been  
112 demonstrated not due to sensory adaptation (a decrease in detecting the stimulus) or motor fatigue  
113 (a decrease in the ability to execute the response) but as a result of learned adaptation of the startle  
114 circuit (30). This behavior meets all habituation criteria (3), including spontaneous recovery and  
115 dishabituation with a novel stimulus (30, 36). The rich genetic toolbox of *Drosophila* allows for  
116 dissection of neuronal substrates and mechanisms of light-off jump habituation.

117 Here, we use inducible RNA interference (RNAi) in *Drosophila* to systematically assess the  
118 role of 286 genes that are well-established to cause ID in humans when mutated (hereinafter  
119 referred to as ID genes). 69 of them (24%) have also been implicated in ASD (37, 38) (hereinafter  
120 referred to as ID plus ASD-associated genes). We report more than a hundred novel genes required  
121 for habituation learning. This substantially exceeds the number of previously known regulators of  
122 habituation across paradigms and species, and identifies habituation learning as a widely affected  
123 mechanism in ID/ASD disorders. We further systematically reveal the relation of these genes to their  
124 associated clinical phenotypes and molecular functions, and determine neuronal substrates of Ras-  
125 MAPK signaling, which we identify as a central key pathway controlling habituation.

126

## 127 **Methods and Materials**

### 128 **Investigated ID genes**

129 A systematic source of ID genes and their *Drosophila* orthologs is available online (SysID database,  
130 [sysid.cmbi.umcn.nl](http://sysid.cmbi.umcn.nl) (39)). We investigated the *Drosophila* orthologs of 286 human ID genes from the  
131 SysID category primary ID genes (**Table S1**) (containing mutations with robust published evidence for  
132 causality, see **Supplemental Methods (SM)**). SysID inclusion criteria and in/exclusion criteria of  
133 experimentally investigated genes are indicated in the **SM**). In brief, the vast majority of genes are  
134 from the first data freeze of the SysID database (all ID genes with proven causality, status of mid  
135 2010). Genes have been included based on conservation in *Drosophila*, available tools (RNAi) from

136 large-scale resources and viability as a prerequisite for behavioral testing. No selection was  
137 performed.

138

139 Information about the identification of *Drosophila* orthologs, proposed disease mechanism, light-off  
140 habituation assay and analysis, phenotype reproducibility, *Drosophila* stocks, fatigue assay, quality  
141 criteria for RNAi lines, annotation of ID plus ASD associated genes, comparison of behavior and  
142 cognition in ASD SSC, molecular interaction network, clustering, physical interaction enrichment  
143 (PIE), enrichment analysis, data visualization and statistics are described in the **SM**.

144

145 **Results:**

146

147 **Systematic identification of habituation deficits in *Drosophila* models of ID**

148 To identify novel genes implicated in habituation, we systematically investigated the role of 278  
149 *Drosophila* orthologs representing 286 human ID genes in the light-off jump habituation paradigm.  
150 We induced neuron-specific knockdowns of each ID gene ortholog by RNAi (24) using 513 RNAi lines  
151 fulfilling previously established quality criteria (39, 40), with two independent constructs per gene  
152 whenever available. These were crossed to the panneuronal elav-Gal4 driver line (see **SM**).  
153 Knockdown is a suitable approach for modeling of the here-investigated human disease conditions  
154 since (partial) loss of function is considered to be the underlying mechanism in the vast majority of  
155 these disorders (40) (**Table S1**). Restricting gene knockdown to neurons eliminates potential effects  
156 on viability or organismal fitness originating from an essential role of genes in other tissues and  
157 establishes neuron-autonomous mechanisms.

158 Knockdown and control flies of identical genetic background were subjected to a series of  
159 100 light-off stimuli, hereinafter referred to as trials, in the light-off jump habituation paradigm. The  
160 screening procedure and paradigm allowed us to distinguish the following parameters: viability,  
161 initial jump response (percentage of flies that jumped in at least one of the first five trials), and  
162 premature and reduced habituation, with the latter representing the learning-defective phenotype  
163 category of main interest. Genotypes with a good initial jump response ( $\geq 50\%$  initial jumpers) but  
164 premature habituation were subjected to a secondary assay to evaluate their organismal fitness and  
165 exclude fatigue as a confounder of premature habituation (see **SM** and **Figure S1**). Based on these  
166 parameters, genes were assigned to at least one of four phenotype categories (**Figure A1**): (1) “not  
167 affected”: (both) tested RNAi lines targeting such genes were viable, showed good initial jump  
168 response, and had no significant effect on habituation (based on the FDR-corrected p-value ( $p_{adj}$ ), see  
169 **SM**); (2) “reduced organismal fitness”: at least one RNAi line led to lethality, poor jump response  
170 ( $< 50\%$  initial jumpers), or premature habituation because of increased fatigue; (3) “habituation



171 deficient”: at least one RNAi line showed good initial jump response but failed to suppress their  
172 response with the increasing number of light-off trials (based on  $p_{adj}$ ); and (4) “premature  
173 habituation”: at least one RNAi line showed good initial jump response followed by faster decline  
174 (based on  $p_{adj}$ ), without fatigue being detectable in the secondary assay. Still, this later phenotype  
175 category can result from other defects than improved habituation, and will be further investigated  
176 elsewhere. In this study we focus on habituation deficits (3), corresponding to the phenotype that  
177 has been shown in ID and ASD (10–14).

178 We validated the experimental approach to identify genes which, if manipulated, cause  
179 habituation deficits (hereinafter referred to as habituation deficient genes) by recapitulating  
180 published habituation deficits of *Drosophila* ID null mutant models *G9a* (22) and *Synapsin* (41), and of  
181 the classical learning and memory mutant *dunce* (27, 42, 43) (**Figure 1B,C,D**). This demonstrates that  
182 light-off jump habituation in combination with RNAi can efficiently identify genetic regulators of  
183 habituation learning.

184 In our screen, we found that the *Drosophila* orthologs of 98 human ID genes (35% of all  
185 investigated orthologs) are required, in neurons, for habituation learning. This phenotype represents  
186 a highly specific defect in behavioral adaptation to the stimulus; flies keep on jumping in response to  
187 the repetitive light-off stimulus, illustrating that they do not suffer from broad neuronal transmission  
188 deficits (which would disable jumping), fatigue, sensory or other deficiencies. 27% of ID gene  
189 orthologs had no effect on habituation, whereas 41% of genes fell into the category of “reduced  
190 organismal fitness”, and 8% of genes showed “premature habituation” without detectable fatigue.  
191 The complete list of habituation screen results and distribution of human ID genes in phenotype  
192 categories can be found in **Table S2, S3**. The screen thus identified nearly a hundred disease genes  
193 controlling habituation learning.

194

195 ***Drosophila* habituation deficits characterize ID genes associated with macrocephaly**

196 To understand whether habituation deficits in *Drosophila* represent a proxy of specific phenotypes in  
197 human individuals, we performed enrichment analysis among ID-associated clinical core features  
198 (39). We found that orthologs of ID genes associated with habituation deficits in *Drosophila* are  
199 specifically enriched among ID genes associated with macrocephaly/overgrowth (**Figure 2A**,  $E=2.21$ ,  
200  $p=0.0095$ , **Table S4**) and vegetative anomalies (**Figure 2A**,  $E=2.14$ ,  $p=0.0495$ , **Table S4**). In contrast, ID  
201 genes associated with the severe “reduced organismal fitness” phenotype category show enrichment  
202 in different, severe ID-associated features such as limb anomalies, brain malformations, endocrine  
203 and eye anomalies (**Figure S2**, **Table S4**). Moreover, ID genes not giving rise to habituation deficits  
204 (“not affected” category) did not show any enrichment among ID-associated clinical features (**Figure**  
205 **2A**, **Table S4**).

206

### 207 **Habituation deficits characterize ID genes associated with ASD and deficits in specific ASD-relevant** 208 **behavioral domains**

209 There is a long-known relationship between macrocephaly and autism (44). For this reason and  
210 because of the potential relevance of habituation deficits to ASD (10–12), we decided to further  
211 investigate the relationship of *Drosophila* habituation and human ASD. We used the Simons Simplex  
212 Collection (SSC) (37), a genetically and phenotypically well-characterized cohort of sporadic ASD  
213 individuals. We matched genes with likely gene-disrupting (LGD) *de novo* mutations (45) in this ASD  
214 cohort to those included in our experimental *Drosophila* habituation approach. 86 ASD individuals  
215 carried mutations in 59 of the investigated genes (**Table S5**). We first asked whether these ID plus  
216 ASD-associated genes preferentially fall into a specific *Drosophila* phenotype category. Strikingly,  
217 they are significantly enriched among the genes that in *Drosophila* caused habituation deficits (**Figure**  
218 **3A**,  $E=1.57$ ,  $p=0.014$ , **Table S4**, ASD SSC). Independently, significant enrichment was obtained for  
219 high-confidence ID plus ASD-associated genes identified from the SFARI database (38) (41  
220 investigated genes, **Figure 3B**,  $E=1.58$ ,  $p=0.023$ , **Table S4**, ASD SFARI), confirming a relationship  
221 between *Drosophila* habituation deficits and human ASD.

222 To further characterize the relationship between *Drosophila* habituation and human  
223 phenotypes, we divided the SSC individuals into two distinct clusters based on their habituation  
224 phenotype in the corresponding fly models: habituation deficits (N=41 individuals, 29 genes) and no  
225 habituation deficits (N=23 individuals, 16 genes) (**Table S5**). We compared both groups across five  
226 broad quantitative measures of behavior and cognition: cognitive ability (full-scale IQ); Social  
227 Responsiveness Scale (SRS); depression and anxiety (Child Behavior Checklist Internalizing Disorders,  
228 CBCL-Int); impulsivity, attention and conduct (Child Behavior Checklist Externalizing Disorders, CBCL-  
229 Ext); and atypical behavior (Aberrant Behavior Checklist, ABC). There was no significant difference for  
230 IQ ( $p=0.80$ ), SRS ( $p=0.49$ ), or CBCL-Int ( $p=0.07$ ), but a significant difference for CBCL-Ext ( $p=0.04$ ) and  
231 ABC ( $p=0.004$ ; **Figure 3C, Table S6**). The latter persists even in case of multiple testing correction  
232 ( $p<0.01$ ). This effect is mainly driven by the ABC subdomains of inappropriate, stereotypic speech  
233 ( $p=0.003$ ), with a nominal contribution from the subdomains of hyperactivity ( $p=0.016$ ) and  
234 irritability ( $p=0.03$ ) but not by lethargy ( $p=0.11$ ) or stereotypy ( $p=0.16$ ) (**Table S6**). In summary, these  
235 data provide a direct indication that habituation deficits in *Drosophila* are relevant to ASD-implicated  
236 genes. They also suggest that SSC individuals carrying LGD mutations in genes associated with  
237 habituation deficits in *Drosophila* show a higher rate and/or severity of atypical behaviors associated  
238 with stereotypic speech, hyperactivity and irritability.

239

#### 240 **Habituation deficits characterize ID genes with synaptic function**

241 Specificity of “habituation deficient” genes in distinct human disease phenotypes suggests that these  
242 may converge on specific mechanisms also at the molecular level. ID genes are known to be enriched  
243 in a number of biological processes, but which are important for habituation? Performing an  
244 enrichment analysis of ID-enriched Gene Ontology-based (GO) categories (see **SM**) against the  
245 stringent background of the investigated ID genes, we found that “habituation deficient” genes are  
246 significantly enriched in a sole GO-based category: processes related to the synapse (22/44 ID genes,  
247  $E=1.59$ ,  $p=0.024$ , **Figure 4, Table S4**). No enriched GO terms were found in the “not affected”

248 category. Together, our results support synaptic processes to be crucial for habituation, as previously  
249 shown for other forms of this behavior (46, 47).

250

### 251 **Molecular networks and modules underlying habituation**

252 With the rich repertoire of nearly a hundred genes required for habituation that moreover show  
253 specificity for ASD and synapse function, we set out to determine the molecular pathways these  
254 genes are operating in. ID gene products are significantly interconnected via protein-protein  
255 interactions (48, 49). Consistent with previously published findings (39), ID genes investigated in our  
256 screen are 1.69 times enriched in interactions compared to 1000 randomly chosen protein sets of the  
257 same size and number of known interactions (physical interaction enrichment (PIE) score (50) =1.69;  
258  $p < 0.001$ ). To identify biologically relevant modules, we resolved this network into communities with  
259 even tighter interconnectivity using unsupervised community clustering (51). This analysis resulted in  
260 26 communities containing 109 proteins (**Figure 5A, Table S7**). Their proximity and specificity for ID-  
261 enriched GO-based processes are depicted in **Figure S3**. Mapping “habituation deficient” genes onto  
262 the communities (**Figure 5A, red circles**) highlighted modules with high incidence of habituation  
263 deficits (**Figure 5A**).

264

### 265 **A key role for ID and ASD-associated Ras signaling in habituation**

266 Five communities form a large, interconnected module with high incidences of habituation deficits.  
267 However, the tightly interconnected hub at its center is characterized by the absence of habituation  
268 deficits (**Figure 5A, square**). This hub represents the key proteins of Ras-MAPK signaling (**Figure 5B**).  
269 This pathway, best known for its role in cancer, underlies a group of disorders collectively referred as  
270 Rasopathies. Importantly, while 92% of the modeled ID disorders are thought to result from loss of  
271 function of the underlying genes, Rasopathies are caused by gain-of-function mutations in the core  
272 pathway (**Figure 5C, Table S1**). The RNAi approach used in this screen, despite addressing gene  
273 function, did thus not recapitulate the molecular pathology of these specific cognitive disorders.

274 However, Rasopathies can also result from loss of function in negative regulators of the pathway. We  
275 therefore asked whether exactly the same genetic mechanisms that cause Rasopathies in humans  
276 also hold true for habituation deficits in *Drosophila*. In our screen, we tested habituation of three  
277 negative regulators of Ras: NF1 (*Drosophila* Nf1), which can directly inactivate Ras through the GAP  
278 enzymatic activity (52), SPRED1 (*Drosophila* Spred) (53, 54), and CASK (*Drosophila* CASK) (55).  
279 Panneuronal knockdown of either negative regulator caused strong habituation deficits (**Figure 5D, in**  
280 **red**). We therefore tested a constitutively active *Ras* mutant, *Ras1<sup>R68Q</sup>* (56). Heterozygous *Ras1<sup>R68Q</sup>*  
281 flies showed strong habituation deficits compared to the control flies with the same genetic  
282 background ( $p=3.56 \times 10^{-9}$ ; **Figure 5D, in green**). Moreover, the same was true when we  
283 overexpressed, specifically in neurons, the same mutant *Ras* allele from an inducible transgenic  
284 construct ( $p=1.96 \times 10^{-6}$ ; **Figure 5D, in green**). We conclude that increased activity of Ras, causing  
285 Rasopathies and associated cognitive deficits in humans, causes habituation deficits in *Drosophila*.

286

### 287 **Habituation-inhibiting function of increased Ras-MAPK signaling maps to inhibitory/GABAergic** 288 **neurons**

289 We next aimed to identify in which type of neurons the habituation-inhibiting function of Ras-MAPK  
290 signaling resides. Because the well-characterized neurons of the giant fiber circuit controlling the  
291 light-off jump response in *Drosophila* are cholinergic (57), just as the majority of excitatory neurons  
292 in *Drosophila*, we first tested whether increased Ras-MAPK signaling activity would induce  
293 habituation deficits when directed to cholinergic neurons. For this, we adopted the knockdown of  
294 negative Ras regulators (*Nf1*, *Spred* and *CASK*) and expressed constitutively active *Ras1* (*Ras1<sup>R68Q</sup>*). In  
295 addition, we tested expression of a gain-of-function allele of *Raf* (*Raf<sup>GOF</sup>*), a downstream mediator of  
296 Ras signaling. We crossed these inducible UAS alleles to the cholinergic Cha-Gal4 driver and assessed  
297 habituation. None of these conditions recapitulated the panneuronally evoked habituation deficits  
298 (**Figure 6A**).

299           Because of the recently established role of GABAergic neurons in *Drosophila* olfactory and  
300 proboscis extension reflex habituation (28, 58, 59) and the emerging importance of GABA inhibition  
301 in autism (60), we next targeted GABA neurons using the *Gad1-Gal4* driver and the same toolbox to  
302 increase Ras-mediated signaling activity. Notably, this consistently induced habituation deficits in all  
303 tested conditions (**Figure 6B**), recapitulating the observed panneuronally evoked deficits. We  
304 conclude that the habituation-inhibiting function of increased Ras-MAPK signaling maps to  
305 GABAergic neurons.

306

### 307 **Ras-MAPK signaling in cholinergic neurons is essential for habituation learning**

308 In the panneuronal screen, RNAi-mediated knockdown of the Ras pathway core components *Ras*, *Raf*  
309 and *Mek* resulted, likely due to their promiscuous role and fundamental importance, in impaired  
310 jump response or increased fatigue (“reduced organismal fitness” category). This could potentially  
311 mask an essential role for Ras signaling in habituation, in addition to the habituation-inhibiting  
312 function of increased Ras-MAPK signaling. In fact, in our panneuronal RNAi screen not only  
313 knockdown of negative regulators but also of two established positive Ras-MAPK regulators, *Sos* and  
314 *Csw*, resulted in habituation deficits. We therefore addressed whether decreased Ras-MAPK signaling  
315 could also be critical for habituation learning. We downregulated Ras-MAPK activity by crossing the  
316 UAS-based RNAi lines targeting *Sos* and *Csw*, but also RNAi lines targeting *Ras*, *Raf* and *Mek*, to the  
317 GABAergic driver *Gad1-Gal4*. We did not observe any detrimental effect on habituation (**Figure 6D**).  
318 In contrast, downregulating Ras-MAPK signaling using the same toolset in cholinergic neurons  
319 consistently prevented normal habituation learning (**Figure 6C**). We conclude that Ras-MAPK  
320 signaling is essential in cholinergic but not in GABAergic neurons. Thus, Ras-MAPK signaling plays a  
321 dual, opposing role in inhibitory versus excitatory neurons in habituation learning.

322

323 **Discussion:**

324 ***Drosophila* screen identifies deficits in habituation learning as a widely affected mechanism in**  
325 **autism**

326 To systematically address the genetic basis of habituation deficits associated with  
327 neurodevelopmental disorders, we investigated 286 ID/ASD genes with a clear *Drosophila* ortholog in  
328 light-off jump habituation. Panneuronal knockdown of 98 ID/ASD genes specifically suppressed the  
329 adaptive habituation response to repeated stimulation without affecting organismal health or  
330 fitness. Follow-up work on the Ras-MAPK pathway raised this number to 104. 93 of these are novel  
331 regulators of habituation, substantially exceeding the sum of previously recognized habituation  
332 genes across species and paradigms. Our data strongly suggest that deficits in habituation learning  
333 are a widely affected mechanism in ID/ASD. Stringent criteria for RNAi specificity and correction for  
334 multiple testing (see **SM**) in our experiments ensured a minimal level of potential false positive  
335 discoveries. Of eleven previously identified ID/ASD genes with habituation deficits, our screen  
336 confirmed eight (**Table S8**). Habituation deficits might therefore be a hallmark of even more ID/ASD  
337 genes than determined here. In particular, the phenotype category of “reduced organismal fitness” is  
338 likely to contain genes with promiscuous functions masking a specific role in habituation learning.

339 Enrichment analysis of ID-associated clinical features revealed that “habituation deficient” ID  
340 genes are preferentially characterized by macrocephaly/overgrowth. Macrocephaly has been since  
341 long associated with ASD (44). Strikingly, we found that mutations in genes associated with  
342 *Drosophila* habituation deficits are significantly overrepresented among ASD individuals (SFARI  
343 database, 50%; SSC cohort: 48% of genes). SSC individuals carrying mutations in these genes show a  
344 high rate and/or severity of aberrant behaviors associated with stereotypic speech, hyperactivity and  
345 irritability, suggesting that habituation deficits may contribute to specific behavioral anomalies in  
346 ASD. Habituation deficits thus represent a common phenotypic signature of ASD in *Drosophila* and  
347 highlight specific behavioral subdomains affected in ASD.

348

349 **Synapse-related processes and Ras-MAPK signaling play a key role in habituation**

350 Synapse biology has been proposed to play a central role in ASD (61). Our data show that among the  
351 investigated disease genes, “habituation deficient” genes are specifically enriched in genes with  
352 synaptic function. This is in line with habituation representing a measurable form of synaptic  
353 plasticity (8, 47).

354 Analyzing the distribution of “habituation deficient” genes in ID-specific molecular  
355 interaction networks, we discovered that they accumulate in a multiple-community module and  
356 connect to the Ras-MAPK pathway core proteins Ras, Raf and Mek (**Figure 5A,B**). We observed  
357 habituation deficits upon panneuronal knockdown of Ras negative regulators and panneuronal  
358 expression of the constitutively active *Ras* allele *Ras1<sup>R68Q</sup>* (**Figure 5C**), demonstrating that increased  
359 Ras-mediated signaling causes habituation deficits. Moreover, proteins encoded by “habituation  
360 deficient” genes form a significantly interconnected module (**Figure 7**). The coherence of this module  
361 further supports the validity of the chosen RNAi approach to identify genes and molecular processes  
362 regulating habituation learning. The module contains a number of synaptic proteins (**Figure 7**) with  
363 not yet investigated roles in Ras signaling. It would be interesting to determine whether some of  
364 these enlarge the spectrum of diseases caused by deregulated Ras signaling.

365

366 **Ras-MAPK signaling exerts a dual but opposing role in inhibitory versus excitatory neurons, a novel  
367 systems-level mechanism**

368 Identification of neuronal substrates in which specific ID genes are required to warrant habituation  
369 learning is important for understanding of the neuronal mechanisms underlying habituation in flies  
370 and cognitive dysfunction in individuals with ID/ASD. Restoring the function of affected neurons  
371 might represent a suitable treatment strategy. The light-off jump startle circuit of *Drosophila* is  
372 relatively simple and well described. The chemical component is *Drosophila's* major excitatory  
373 neurotransmitter, acetylcholine (57). However, it is not known how habituation of this circuit is  
374 regulated. The commonly accepted view regards synaptic depression in excitatory neurons, induced



375 by repetitive stimulation, as the underlying mechanism (46, 62). This has recently been challenged by  
376 Ramaswami and colleagues who showed that plasticity of inhibitory, GABAergic neurons drives two  
377 non-startle types of habituation (58, 59). We found that increased activity of our identified key  
378 pathway, Ras-MAPK, in GABAergic but not in cholinergic neurons causes deficits in light-off jump  
379 habituation. Our results thus support inhibitory circuits as crucial components of habituation learning  
380 across different paradigms and sensory modalities. Further experiments are needed to establish the  
381 direct involvement of GABAergic signaling. At the same time, we identified that also decreased Ras-  
382 MAPK signaling activity can lead to habituation deficits. Yet, the neuronal substrates of these deficits  
383 are different and map to excitatory, cholinergic neurons. Although our experiments do not  
384 distinguish between developmental effects and acute circuit plasticity, the opposing role for Ras-  
385 MAPK signaling on habituation may provide new insights into mechanisms of neural plasticity in  
386 health and disease. It may also have crucial implications for treatment of Rasopathies. Future clinical  
387 trials, as opposed to those that broadly decreased Ras activity and failed (63), may need more  
388 attention towards restoring circuit function and balance.

389

390 **Translational value and application of cross-species habituation measures for diagnosis and**  
391 **treatment of ID and ASD**

392 Based on our findings that habituation is widely affected in *Drosophila* models of ID, and that  
393 habituation deficits are particularly common among genes also implicated in ASD, we propose that  
394 disrupted habituation may contribute to ID/ASD pathology.

395 The emerging importance of inhibitory inputs for habituation ((28, 58) and this study) and  
396 sensory information filtering in the cortical centers of the brain (64, 65) suggests the existence of an  
397 overarching circuit-based mechanism responsible for prevention of inappropriate behavioral  
398 responses (8). Though our findings that habituation deficits in *Drosophila* correlate with increased  
399 rate and/or severity of atypical behaviors compared to ID/ASD genes without habituation deficits  
400 should be replicated, we speculate that disrupted habituation arising from GABAergic defects

401 represents a mechanism that contributes to these core ID/ASD features. As such, it has potential to  
402 serve as a cross-species, mechanism-specific functional readout—a pressing need for efficient  
403 personalized (pharmacological) treatment in the field of neurodevelopmental disorders.  
404 Implementing suitable low-burden protocols for habituation measures in clinical research and  
405 diagnostics of ID/ASD, such as those developed for investigation of habituation deficits in Fragile X  
406 syndrome (13), will help to further delineate the affected cognitive domains that arise from deficient  
407 habituation. In future clinical trials, these could serve as objective and quantitative readouts for  
408 patient stratification in mechanism-based treatment strategies and for monitoring of drug efficacy.  
409 Dissection of the underlying defective mechanisms in *Drosophila* can at the same time identify novel  
410 targets for treatment, with high-throughput light-off jump habituation serving as a translational  
411 pipeline for drug testing.

412

413 **Acknowledgements:**

414 We acknowledge the Vienna *Drosophila* Resource Center and Bloomington *Drosophila* Stock Center  
415 (NIH P40OD018537) for providing *Drosophila* strains. We thank the anonymous expert referees for  
416 their help to improve our manuscript. This research was supported in part by the European Union's  
417 FP7 large-scale integrated network Gencodys (HEALTH-241995) to Z.A. and A.S., by FP7 TACTICS,  
418 OPTIMISTIC, Aggressotype and MATRICS (HEALTH grant agreement numbers n°278948, n°305697,  
419 n°602805 and n°603016) to J.C.G., by a TOP grant (912-12-109) from The Netherlands Organization  
420 for Scientific Research (NWO), by a Horizon 2020 Marie Skłodowska-Curie European Training  
421 Network grant (MiND, 643051), by a grant from the Jérôme Léjeune foundation to A.S., and by U.S.  
422 National Institute for Mental Health (NIMH) funding (R01MH101221 to E.E.E. & R01MH100047 to  
423 R.B.). E.E.E is an investigator of the Howard Hughes Medical Institute. We are grateful to all of the  
424 families at the participating Simons Simplex Collection (SSC) sites, as well as the principal  
425 investigators (A. Beaudet, R. Bernier, J. Constantino, E. Cook, E. Fombonne, D. Geschwind, R. Goin-  
426 Kochel, E. Hanson, D. Grice, A. Klin, D. Ledbetter, C. Lord, C. Martin, D. Martin, R. Maxim, J. Miles, O.  
427 Ousley, K. Pelphrey, B. Peterson, J. Piggot, C. Saulnier, M. State, W. Stone, J. Sutcliffe, C. Walsh, Z.  
428 Warren, E. Wijsman). We appreciate obtaining access to phenotypic data on SFARI Base. Approved  
429 researchers can obtain the SSC population dataset described in this study  
430 (<http://sfari.org/resources/simons-simplex-collection>) by applying at <https://base.sfari.org>.

431

432 **Financial disclosures:**

433 In the past 3 years, J.C.G. has acted as a consultant to Boehringer Ingelheim GmbH but is not an  
434 employee, stock- or share-holder of this company. He has no other financial or material support to  
435 declare, including expert testimony, patents and royalties. E.E.E. is on the scientific advisory board  
436 (SAB) of DNAnexus, Inc.. Z.S. is a director of Aktogen Ltd.. M.F., L.E., P.C., E.L.S., L.R.B., J.I.H., C.Z.,  
437 R.A.B. and A.S. declare that they have no conflict of interests.

438

439 **References:**

- 440 1. Peeke H (1973): *Habituation: Behavioral studies*. (Vol. 1), Academic Press.
- 441 2. Colombo J, Mitchell DW (2009): Infant visual habituation. *Neurobiol Learn Mem*. 92: 225–234.
- 442 3. Rankin CH, Abrams T, Barry RJ, Bhatnagar S, Clayton D, Colombo J, *et al.* (2009): Habituation Revisited: An Updated and  
443 Revised Description of the Behavioral Characteristics of Habituation. *Neurobiol Learn Mem*. 92: 135–138.
- 444 4. Barron HC, Vogels TP, Behrens TE, Ramaswami M (2017): Inhibitory engrams in perception and memory. *Proc Natl Acad*  
445 *Sci*. 201701812.
- 446 5. Kavšek M (2004): Predicting later IQ from infant visual habituation and dishabituation: A meta-analysis. *J Appl Dev*  
447 *Psychol*. 25.
- 448 6. Glanzman DL (2010): Common Mechanisms of Synaptic Plasticity in Vertebrates and Invertebrates. *Curr Biol*. 20. doi:  
449 10.1016/j.cub.2009.10.023.
- 450 7. Schmid S, Wilson DA, Rankin CH (2015): Habituation mechanisms and their importance for cognitive function. *Front*  
451 *Integr Neurosci*. 77: 419–450.
- 452 8. Ramaswami M (2014): Network plasticity in adaptive filtering and behavioral habituation. *Neuron*. 82.
- 453 9. Sinha P, Kjelgaard MM, Gandhi TK, Tsourides K, Cardinaux AL, Pantazis D, *et al.* (2014): Autism as a disorder of prediction.  
454 *Proc Natl Acad Sci*. 111: 15220–5.
- 455 10. Pellicano E, Rhodes G, Calder AJ (2013): Reduced gaze aftereffects are related to difficulties categorising gaze direction  
456 in children with autism. *Neuropsychologia*. 51: 1504–1509.
- 457 11. Ewbank MP, Rhodes G, Von Dem Hagen EAH, Powell TE, Bright N, Stoyanova RS, *et al.* (2015): Repetition suppression in  
458 ventral visual cortex is diminished as a function of increasing autistic traits. *Cereb Cortex*. 25: 3381–3393.
- 459 12. Swartz JR, Wiggins JL, Carrasco M, Lord C, Monk CS (2013): Amygdala habituation and prefrontal functional connectivity  
460 in youth with autism spectrum disorders. *J Am Acad Child Adolesc Psychiatry*. 52: 84–93.
- 461 13. Ethridge LE, White SP, Mosconi MW, Wang J, Byerly MJ, Sweeney JA (2016): Reduced habituation of auditory evoked  
462 potentials indicate cortical hyper-excitability in Fragile X Syndrome. *Transl Psychiatry*. 6: e787.
- 463 14. Rigoulot S, Knoth IS, Lafontaine M-P, Vannasing P, Major P, Jacquemont S, *et al.* (2017): Altered visual repetition

- 464 suppression in Fragile X Syndrome: New evidence from ERPs and oscillatory activity. *Int J Dev Neurosci.* 59: 52–59.
- 465 15. Restivo L, Ferrari F, Passino E, Sgobio C, Bock J, Oostra BA, *et al.* (2005): Enriched environment promotes behavioral and  
466 morphological recovery in a mouse model for the fragile X syndrome. *Proc Natl Acad Sci U S A.* 102: 11557–11562.
- 467 16. Lovelace JW, Wen TH, Reinhard S, Hsu MS, Sidhu H, Ethell IM, *et al.* (2016): Matrix metalloproteinase-9 deletion rescues  
468 auditory evoked potential habituation deficit in a mouse model of Fragile X Syndrome. *Neurobiol Dis.* 89: 126–135.
- 469 17. Wolman MA, deGroh ED, McBride SM, Jongens TA, Granato M, Epstein JA (2014): Modulation of cAMP and Ras  
470 Signaling Pathways Improves Distinct Behavioral Deficits in a Zebrafish Model of Neurofibromatosis Type 1. *Cell Rep.*  
471 8: 1265–1270.
- 472 18. Kirshenbaum GS, Clapcote SJ, Duffy S, Burgess CR, Petersen J, Jarowek KJ, *et al.* (2011): Mania-like behavior induced by  
473 genetic dysfunction of the neuron-specific Na<sup>+</sup>,K<sup>+</sup>-ATPase  $\alpha$ 3 sodium pump. *Proc Natl Acad Sci U S A.* 108: 18144–9.
- 474 19. Cheli VT, Adrover MF, Blanco C, Verde ER, Guyot-Revoll V, Vidal R, *et al.* (2002): Gene transfer of NMDAR1 subunit  
475 sequences to the rat CNS using herpes simplex virus vectors interfered with habituation. *Cell Mol Neurobiol.* 22: 303–  
476 314.
- 477 20. Walsh J, Desbonnet L, Clarke N, Waddington JL, O’Tuathaigh CMP (2012): Disruption of exploratory and habituation  
478 behavior in mice with mutation of DISC1: An ethologically based analysis. *J Neurosci Res.* 90: 1445–1453.
- 479 21. McBride SMJ, Choi CH, Wang Y, Liebelt D, Braunstein E, Ferreiro D, *et al.* (2005): Pharmacological rescue of synaptic  
480 plasticity, courtship behavior, and mushroom body defects in a Drosophila model of Fragile X syndrome. *Neuron.* 45:  
481 753–764.
- 482 22. Kramer JM, Kochinke K, Oortveld MAW, Marks H, Kramer D, de Jong EK, *et al.* (2011): Epigenetic regulation of learning  
483 and memory by Drosophila EHMT/G9a. *PLoS Biol.* 9. doi: 10.1371/journal.pbio.1000569.
- 484 23. van der Voet M, Nijhof B, Oortveld MAW, Schenck A (2014): Drosophila models of early onset cognitive disorders and  
485 their clinical applications. *Neurosci Biobehav Rev.* 46.
- 486 24. Dietzl G, Chen D, Schnorrer F, Su K-C, Barinova Y, Fellner M, *et al.* (2007): A genome-wide transgenic RNAi library for  
487 conditional gene inactivation in Drosophila. *Nature.* 448: 151–6.
- 488 25. Bellen HJ, Tong C, Tsuda H (2010): 100 years of Drosophila research and its impact on vertebrate neuroscience: a history  
489 lesson for the future. *Nat Rev Neurosci.* 11: 514–22.

- 490 26. Duerr JS, Quinn WG (1982): Three *Drosophila* mutations that block associative learning also affect habituation and  
491 sensitization. *Proc Natl Acad Sci U S A*. 79: 3646–3650.
- 492 27. Asztalos Z, Arora N, Tully T (2007): Olfactory Jump Reflex Habituation in *Drosophila* and Effects of Classical Conditioning  
493 Mutations. *J Neurogenet*. 21: 1–18.
- 494 28. Larkin A, Karak S, Priya R, Das A, Ayyub C, Ito K, *et al.* (2010): Central synaptic mechanisms underlie short-term olfactory  
495 habituation in *Drosophila* larvae. *Learn Mem*. 17: 645–653.
- 496 29. Acevedo SF, Froudarakis EI, Kanellopoulos A, Skoulakis EMC (2007): Protection from premature habituation requires  
497 functional mushroom bodies in *Drosophila*. *Learn Mem*. 14: 376–84.
- 498 30. Engel JE, Wu CF (1996): Altered habituation of an identified escape circuit in *Drosophila* memory mutants. *J Neurosci*.  
499 16: 3486–99.
- 500 31. van Bon BWM, Oortveld MAW, Nijtmans LG, Fenckova M, Nijhof B, Besseling J, *et al.* (2013): CEP89 is required for  
501 mitochondrial metabolism and neuronal function in man and fly. *Hum Mol Genet*. 22: 3138–3151.
- 502 32. Willemsen MH, Nijhof B, Fenckova M, Nillesen WM, H F Bongers EM, Castells-Nobau A, *et al.* (2013): GATAD2B loss-of-  
503 function mutations cause a recognisable syndrome with intellectual disability and are associated with learning  
504 deficits and synaptic undergrowth in *Drosophila*. *J Med Genet*. 50: 507–514.
- 505 33. Lugtenberg D, Reijnders MRF, Fenckova M, Bijlsma EK, Bernier R, van Bon BWM, *et al.* (2016): De novo loss-of-function  
506 mutations in WAC cause a recognizable intellectual disability syndrome and learning deficits in *Drosophila*. *Eur J Hum*  
507 *Genet*. 1–9.
- 508 34. Stessman HAF, Willemsen MH, Fenckova M, Penn O, Hoischen A, Xiong B, *et al.* (2016): Disruption of POGZ Is Associated  
509 with Intellectual Disability and Autism Spectrum Disorders. *Am J Hum Genet*. 98: 541–552.
- 510 35. Esmaeeli-Nieh S, Fenckova M, Porter IM, Motazacker MM, Nijhof B, Castells-Nobau A, *et al.* (2016): BOD1 Is Required  
511 for Cognitive Function in Humans and *Drosophila*. *PLoS Genet*. 12. doi: 10.1371/journal.pgen.1006022.
- 512 36. Kelly LE (1983): An altered electroretinogram transient associated with an unusual jump response in a mutant of  
513 *Drosophila*. *Cell Mol Neurobiol*. 3: 143–9.
- 514 37. Fischbach GD, Lord C (2010): The simons simplex collection: A resource for identification of autism genetic risk factors.  
515 *Neuron*. 68.

- 516 38. Basu SN, Kollu R, Banerjee-Basu S (2009): AutDB: A gene reference resource for autism research. *Nucleic Acids Res.* 37.  
517 doi: 10.1093/nar/gkn835.
- 518 39. Kochinke K, Zweier C, Nijhof B, Fenckova M, Cizek P, Honti F, *et al.* (2016): Systematic Phenomics Analysis Deconvolutes  
519 Genes Mutated in Intellectual Disability into Biologically Coherent Modules. *Am J Hum Genet.* 98: 149–164.
- 520 40. Oortveld MAW, Keerthikumar S, Oti M, Nijhof B, Fernandes AC, Kochinke K, *et al.* (2013): Human Intellectual Disability  
521 Genes Form Conserved Functional Modules in *Drosophila*. *PLoS Genet.* 9. doi: 10.1371/journal.pgen.1003911.
- 522 41. Sadanandappa MK, Blanco Redondo B, Michels B, Rodrigues V, Gerber B, VijayRaghavan K, *et al.* (2013): Synapsin  
523 function in GABA-ergic interneurons is required for short-term olfactory habituation. *J Neurosci.* 33: 16576–85.
- 524 42. Dudai Y, Jan YN, Byers D, Quinn WG, Benzer S (1976): dunce, a mutant of *Drosophila* deficient in learning. *Proc Natl*  
525 *Acad Sci U S A.* 73: 1684–8.
- 526 43. Tempel BL, Bonini N, Dawson DR, Quinn WG (1983): Reward learning in normal and mutant *Drosophila*. *Proc Natl Acad*  
527 *Sci.* 80: 1482–1486.
- 528 44. Lainhart JE, Piven J, Wzorek M, Landa R, Santangelo SL, Coon H, Folstein SE (1997): Macrocephaly in children and adults  
529 with autism. *J Am Acad Child Adolesc Psychiatry.* 36: 282–290.
- 530 45. Iossifov I, O’Roak BJ, Sanders SJ, Ronemus M, Krumm N, Levy D, *et al.* (2014): The contribution of de novo coding  
531 mutations to autism spectrum disorder. *Nature.* 13: 216–221.
- 532 46. Castellucci V, Pinsker H, Kupfermann I, Kandel ER (1970): Neuronal Mechanisms of Habituation and dishabituation of  
533 the gill withdrawal reflex in *Aplysia*. *Science (80- ).* 167: 1745–1748.
- 534 47. Poon C-S, Young DL (2006): Nonassociative learning as gated neural integrator and differentiator in stimulus-response  
535 pathways. *Behav Brain Funct.* 2: 29.
- 536 48. Cristino a S, Williams SM, Hawi Z, An J-Y, Bellgrove M a, Schwartz CE, *et al.* (2014): Neurodevelopmental and  
537 neuropsychiatric disorders represent an interconnected molecular system. *Mol Psychiatry.* 19: 294–301.
- 538 49. Honti F, Meader S, Webber C (2014): Unbiased Functional Clustering of Gene Variants with a Phenotypic-Linkage  
539 Network. *PLoS Comput Biol.* 10. doi: 10.1371/journal.pcbi.1003815.
- 540 50. Sama IE, Huynen MA (2010): Measuring the physical cohesiveness of proteins using Physical Interaction Enrichment  
541 (PIE). *Bioinformatics.* 26: 2737–2743.



- 542 51. Kalinka AT, Tomancak P (2011): linkcomm: An R package for the generation, visualization, and analysis of link  
543 communities in networks of arbitrary size and type. *Bioinformatics*. 27: 2011–2012.
- 544 52. Martin GA, Viskochil D, Bollag G, McCabe PC, Crosier WJ, Haubruck H, *et al.* (1990): The GAP-related domain of the  
545 neurofibromatosis type 1 gene product interacts with ras p21. *Cell*. 63: 843–849.
- 546 53. Dunzendorfer-Matt T, Mercado EL, Maly K, McCormick F, Scheffzek K (2016): The neurofibromin recruitment factor  
547 Spred1 binds to the GAP related domain without affecting Ras inactivation. *Proc Natl Acad Sci*. 201607298.
- 548 54. Hirata Y, Brems H, Suzuki M, Kanamori M, Okada M, Morita R, *et al.* (2016): Interaction between a domain of the  
549 negative regulator of the ras-ERK pathway, SPRED1 protein, and the GTPase-activating protein-related domain of  
550 neurofibromin is implicated in legius syndrome and neurofibromatosis type 1. *J Biol Chem*. 291: 3124–3134.
- 551 55. Hsueh YP, Roberts AM, Volta M, Sheng M, Roberts RG (2001): Bipartite interaction between neurofibromatosis type I  
552 protein (neurofibromin) and syndecan transmembrane heparan sulfate proteoglycans. *J Neurosci*. 21: 3764–3770.
- 553 56. Gafuik C, Steller H (2011): A gain-of-function germline mutation in drosophila ras1 affects apoptosis and cell fate during  
554 development. *PLoS One*. 6. doi: 10.1371/journal.pone.0023535.
- 555 57. Allen MJ, Murphey RK (2007): The chemical component of the mixed GF-TTMn synapse in *Drosophila melanogaster* uses  
556 acetylcholine as its neurotransmitter. *Eur J Neurosci*. 26: 439–445.
- 557 58. Das S, Sadanandappa MK, Dervan A, Larkin A, Lee JA, Sudhakaran IP, *et al.* (2011): Plasticity of local GABAergic  
558 interneurons drives olfactory habituation. *Proc Natl Acad Sci U S A*. 108: E646–54.
- 559 59. Paranjpe P, Rodrigues V, VijayRaghavan K, Ramaswami M (2012): Gustatory habituation in *Drosophila* relies on rutabaga  
560 (adenylate cyclase)-dependent plasticity of GABAergic inhibitory neurons. *Learn Mem*. 19: 627–635.
- 561 60. Robertson CE, Ratai EM, Kanwisher N (2016): Reduced GABAergic Action in the Autistic Brain. *Curr Biol*. 26: 80–85.
- 562 61. Bourgeron T (2015): From the genetic architecture to synaptic plasticity in autism spectrum disorder. *Nat Rev Neurosci*.  
563 16: 551–563.
- 564 62. Weber M, Schnitzler HU, Schmid S (2002): Synaptic plasticity in the acoustic startle pathway: The neuronal basis for  
565 short-term habituation? *Eur J Neurosci*. 16: 1325–1332.
- 566 63. van der Vaart T, Plasschaert E, Rietman AB, Renard M, Oostenbrink R, Vogels A, *et al.* (2013): Simvastatin for cognitive  
567 deficits and behavioural problems in patients with neurofibromatosis type 1 (NF1-SIMCODA): A randomised, placebo-

568 controlled trial. *Lancet Neurol.* 12: 1076–1083.

569 64. Isaacson JS, Scanziani M (2011): How inhibition shapes cortical activity. *Neuron.* 72.

570 65. Geramita MA, Burton SD, Urban NN (2016): Distinct lateral inhibitory circuits drive parallel processing of sensory

571 information in the mammalian olfactory bulb. *Elife.* 5. doi: 10.7554/eLife.16039.001.

572

573

574 **Supplemental information**

575 **Document S1.**

576 **Figures S1-S3, Tables S5, S8, Supplemental Methods**

577

578 **Document S2.**

579 **Table S1**

580 **List of investigated human ID genes**

581

582 **Table S2. List of investigated human ID genes, corresponding Drosophila orthologs, RNAi lines, and**

583 **habituation results**

584

585 **Table S3**

586 **Distribution of human ID genes in four phenotype categories identified in Drosophila light-off jump**

587 **habituation screen**

588

589 **Table S4. Enrichments**

590

591 **Table S5. List of investigated SSC and SFARI genes**

592

593 **Table S7. Interaction communities**

594

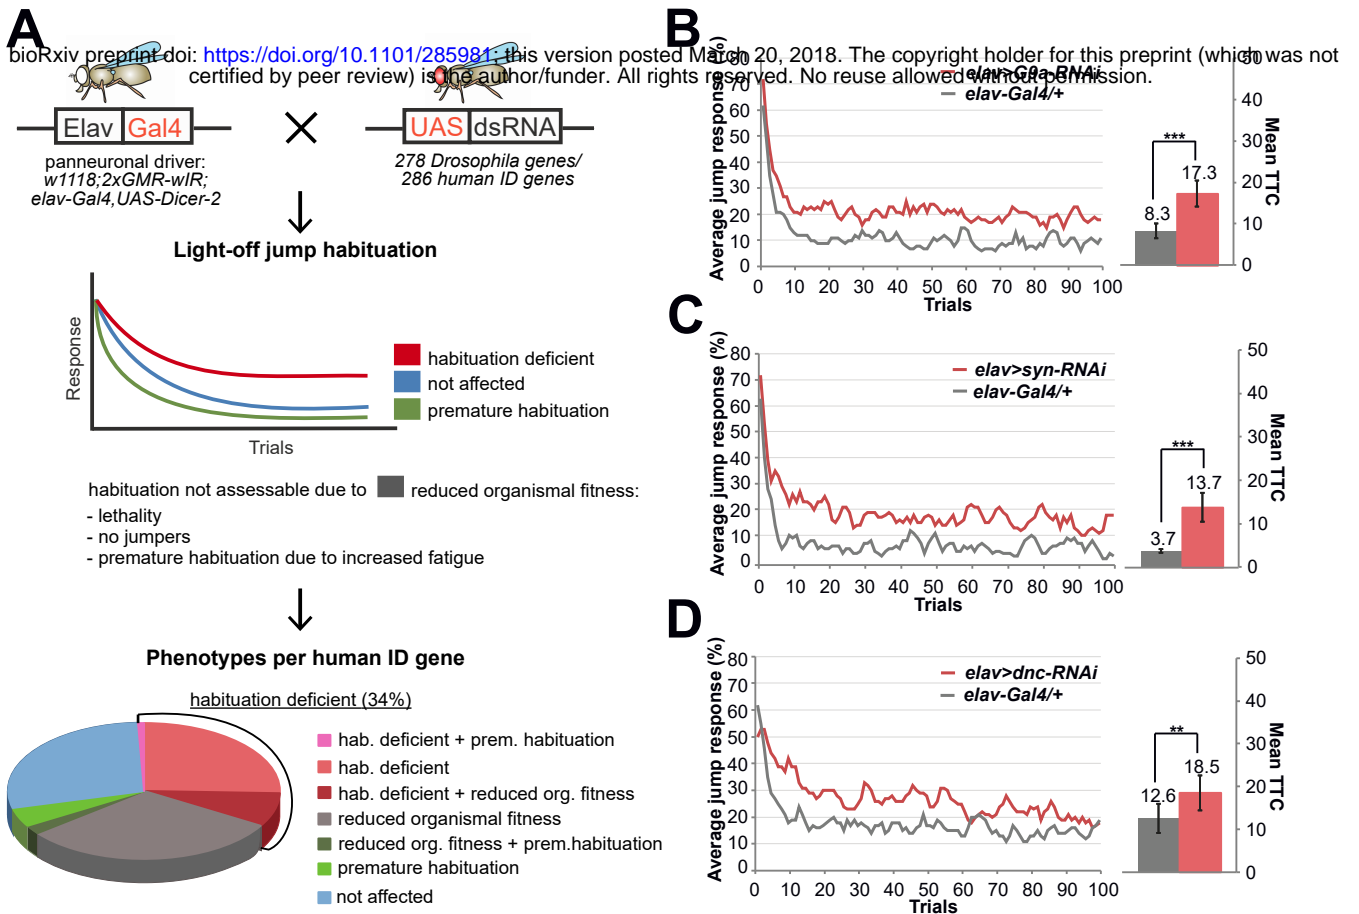

**Figure 1. Habituation screen of intellectual disability genes, phenotype distribution and proof of principle**

(A) Procedure, phenotype categories and phenotype distribution of the light-off jump habituation screen. Knockdowns that resulted in lethality, no jumper phenotype (defined as less than 50% flies jumping in at least one of the first five light-off trials) or premature habituation plus increased fatigue were assigned to the category “reduced organismal fitness” and their habituation was not further analyzed. Other phenotype categories are “habituation deficient”, “not affected”, and “premature habituation” (the latter if no fatigue was detected in secondary assay, see example in **Figure S1**). *Drosophila* orthologs of 34% of the investigated human ID genes were associated with defects in habituation learning. See also **Table S2, S3**. (B, C, D) Defective habituation upon neuron-specific RNAi-mediated knockdown of G9a, Synapsin (syn), and *dunce* (*dnc*) (2xGMR-wIR/+; UAS-RNAi/elav-Gal4, UAS-Dicer-2, in red) compared to their respective genetic background controls (2xGMR-wIR/+; elav-Gal4, UAS-Dicer-2/+, in gray). Jump response curves show the average jump response (% of jumping flies) over 100 light-off trials at 1 s inter-trial interval). Mean TTC: the mean number of trials that flies needed to reach the no-jump criterion (see Methods and Materials) presented as Mean TTC  $\pm$  SEM. \*\*\*  $p_{adj} < 0.001$ , \*\*  $p_{adj} < 0.01$ , based on FDR-corrected lm analysis. A complete list of ID/ASD genes with previously identified habituation defects is provided as **Table S8**, adding further proof of principle.

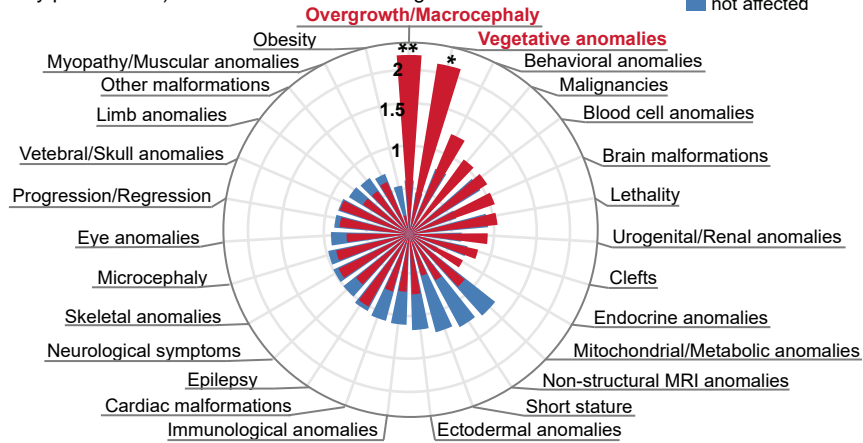

**Figure 2. Habituation defects in *Drosophila* characterize ID genes associated with macrocephaly in humans**  
 Enrichment of *Drosophila* phenotype categories across 27 ID-accompanying clinical features (39). “Habituation deficient” genes show specificity for macrocephaly and/or overgrowth ( $E=2.21$ ,  $p=0.0095$ ) and vegetative anomalies ( $E=2.14$ ,  $p=0.049$ ) \*\*  $p<0.01$ , \*  $p<0.05$ , based on Fisher’s Exact test. For enrichment of “reduced organismal fitness” category, see Figure S2. Enrichment scores, p-values and enriched genes are listed in **Table S4**.

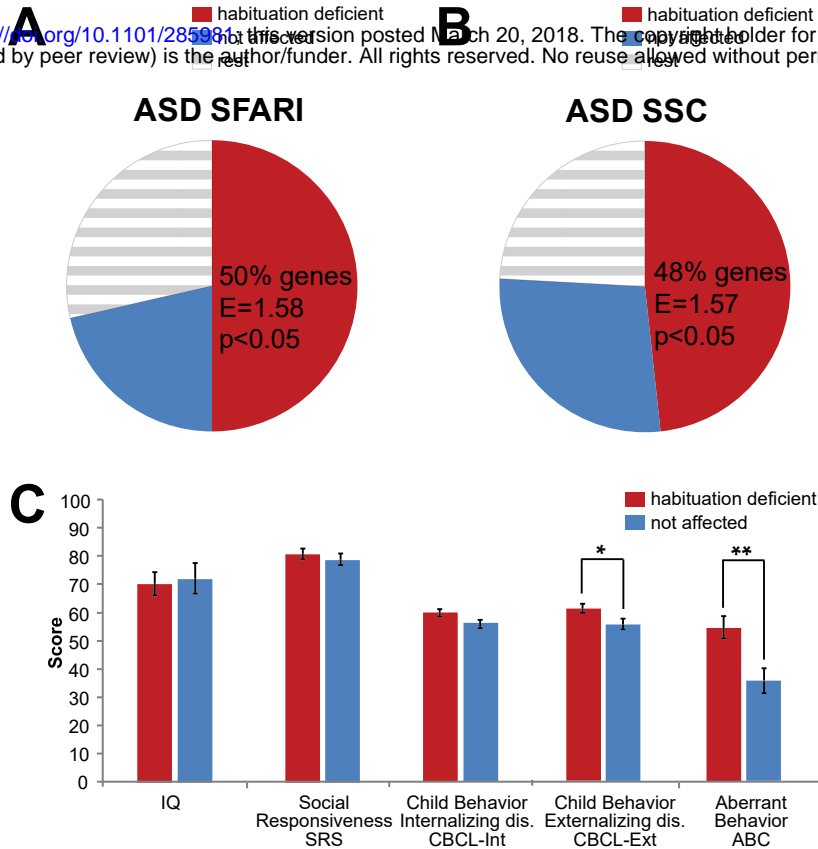

**Figure 3. Habituation defects in *Drosophila* characterize ID genes associated with ASD and deficits in specific behavioral domains**

(A,B) Enrichment of *Drosophila* phenotype categories “habituation deficient” and “not affected” in ID plus ASD-associated genes identified in SFARI database (ASD SFARI,  $E=1.58$ ,  $p=0.023$ , (A)) and SSC cohort (ASD SSC,  $E=1.57$ ,  $p=0.014$  (B)). Circles represent total number of tested ID plus ASD-associated genes. (C) Genes associated with “habituation deficient” versus “not affected” phenotype categories in *Drosophila* show significantly more aberrant behaviors on the ABC ( $F(1,62)=8.9$ ,  $p=0.004$ ) and more CBCL externalizing symptoms ( $F(1,62)=4.3$ , with suggestive p-value,  $p=0.04$ ) in the ASD SSC cohort. Data presented as mean score  $\pm$  SEM. \*\*  $p<0.01$ , \*  $p<0.05$ , based on MANOVA. See also **Table S5** (list of ASD SFARI and ASD SSC genes) and **Table S6** (complete MANOVA results).

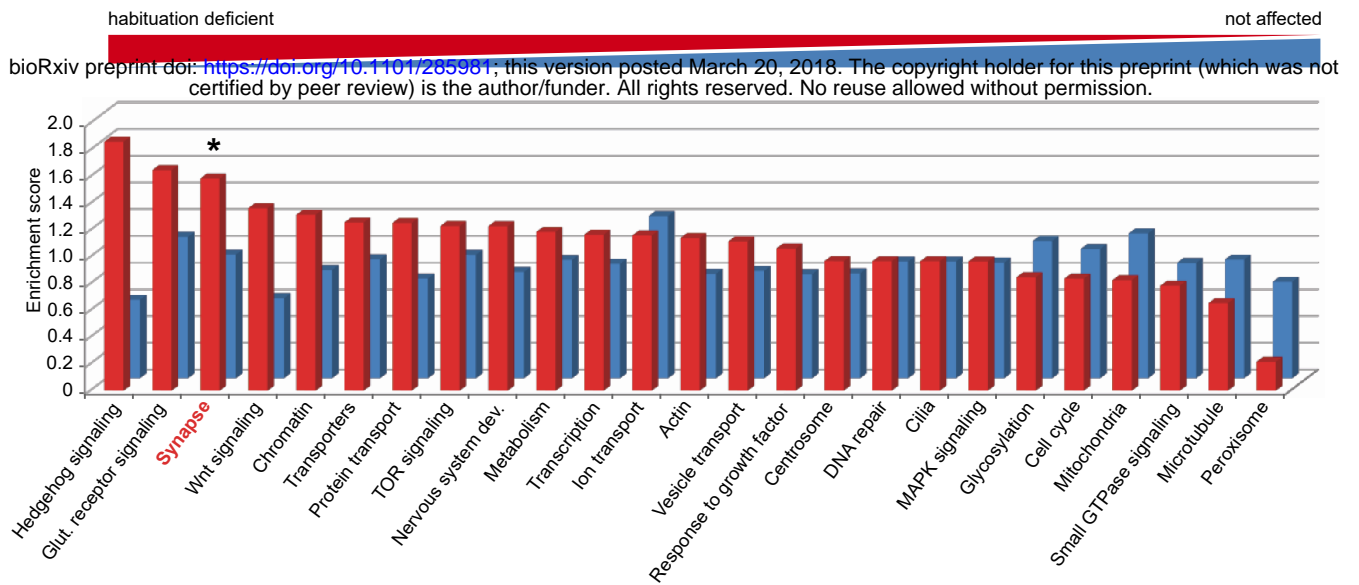

**Figure 4. Habituation defects in *Drosophila* characterize ID genes with synapse-related functions**

Of 25 gene ontology (GO)-based processes, “habituation deficient” genes are specifically and significantly enriched in processes related to synapse ( $E=1.59$ ,  $p=0.024$ ). Genes with no effect on habituation do not show significant enrichment in any GO process. \*  $p<0.05$ , based on Fisher’s exact test. All enrichment scores, p-values and enriched genes are listed in **Table S4**.

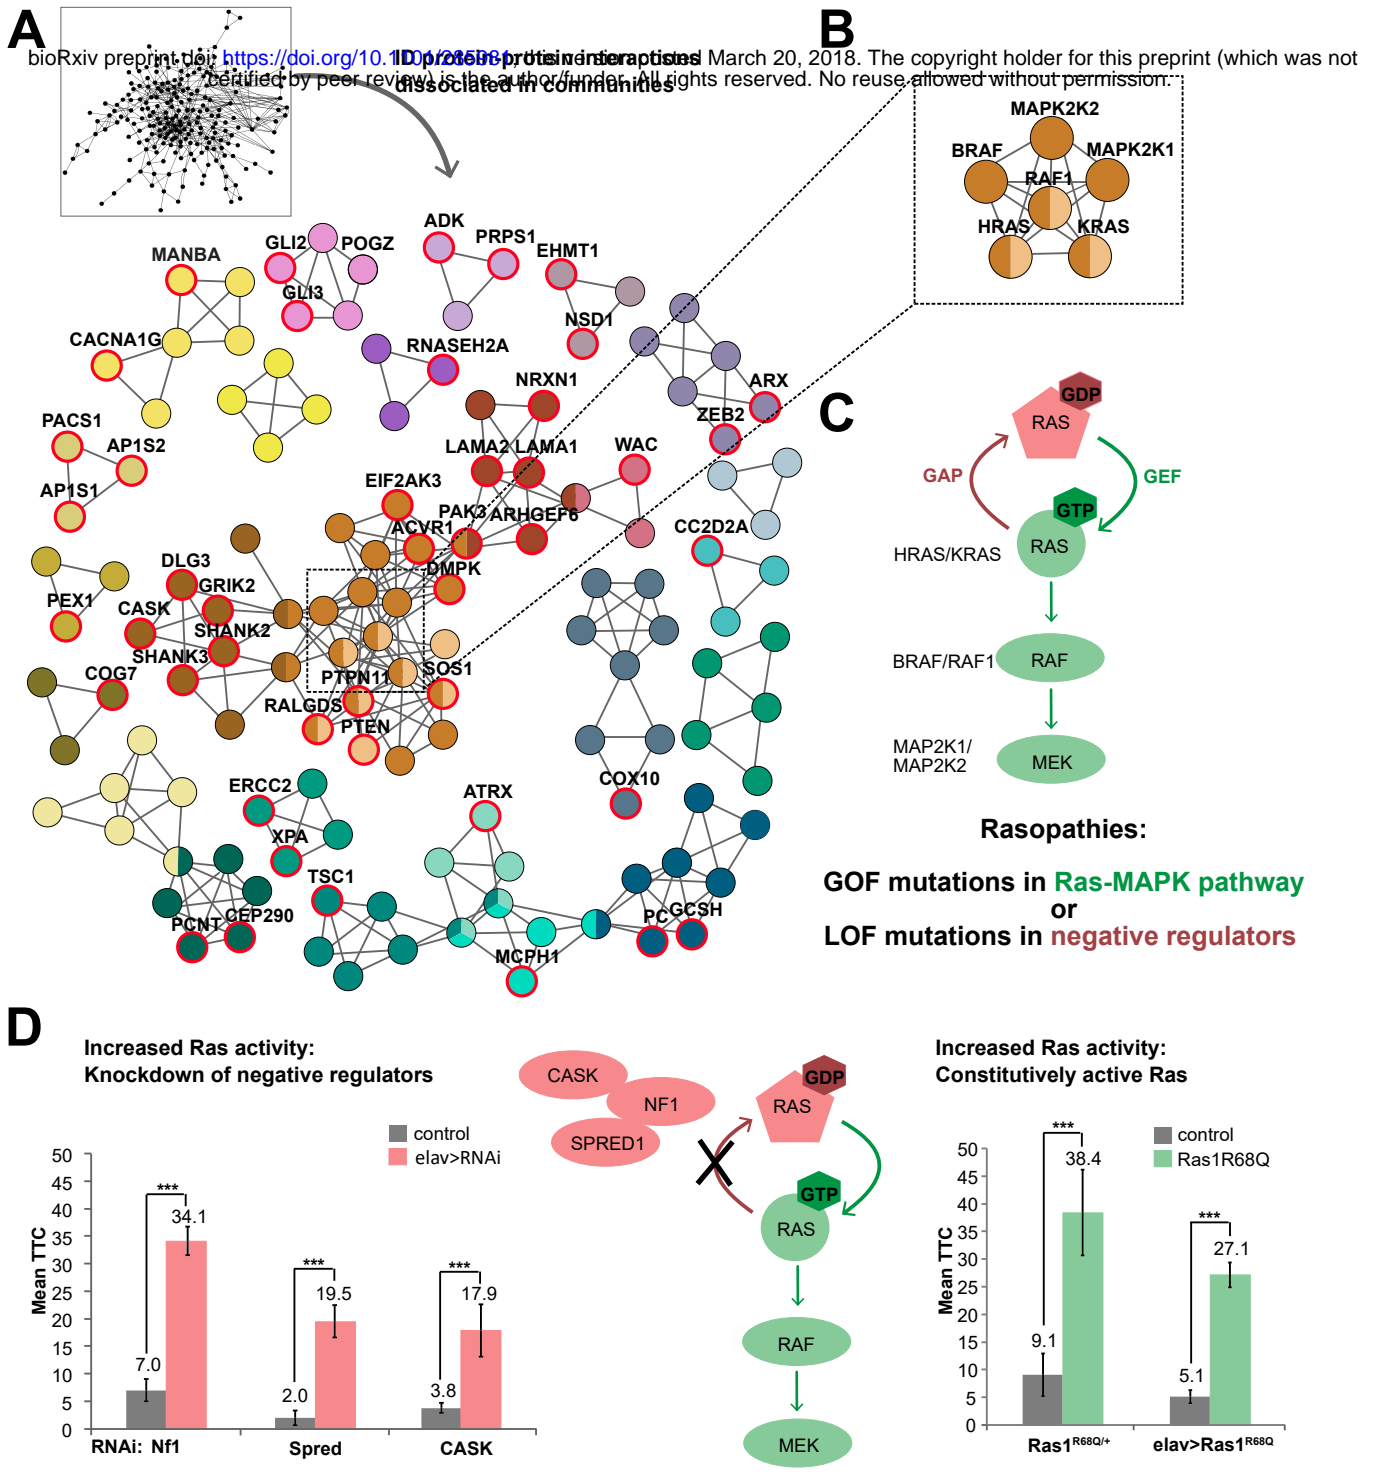

**Figure 5. A central role for Ras-MAPK signaling in habituation learning**

(A) Highly connected communities identified by unbiased community clustering, colored by their functional proximity (Figure S3). Red circles and gene names highlight nodes representing “habitation deficient” genes. For complete list of communities and genes see Table S7. (B) Nodes connecting four communities from the central module represent the core components of Ras-MAPK signaling. (C) Schematic representation of Ras-MAPK signaling and associated mechanisms in ID disorders called ‘Rasopathies’. (D) Increasing Ras signaling by inducing either loss of function of negative Ras regulators (left side of pathway scheme) or by constitutively activating Ras (right side) disrupts habituation learning. Left: Defective habituation upon neuron-specific knockdown of negative Ras regulators, Nf1 (2xGMR-wIR/+; Nf1-RNAivdrc35877/elav-Gal4, UAS-Dicer-2, N=72, in red), Spred (2xGMR-wIR/+; Spred-RNAivdrc18024/elav-Gal4, UAS-Dicer-2, N=73, in red), and CASK (2xGMR-wIR/+; CASK-RNAivdrc34184/elav-Gal4, UAS-Dicer-2, N=75, in red) compared to their corresponding genetic background controls (2xGMR-wIR/+; elav-Gal4, UAS-Dicer-2/+. N: 55, 20, 25, in gray). \*\*\* padj<0.001, based on lm analysis and FDR correction in the screen (see Methods and Materials). Mean TTC ± SEM.



Right Defects in habituation/learning in heterozygous control (N=43 in gray), and upon neuron-specific expression of Ras1R68Q (elav>Ras1R68Q: UAS-Ras1R68Q/2xGMR-wIR; elav-Gal4, UAS-Dicer-2/+, N=52, in green) compared to its genetic background control (2xGMR-wIR/+; elav-Gal4, UAS-Dicer-2/+, N=34, in gray). \*\*\* p<0.001, based on Im analysis. Data presented as Mean TTC ± SEM

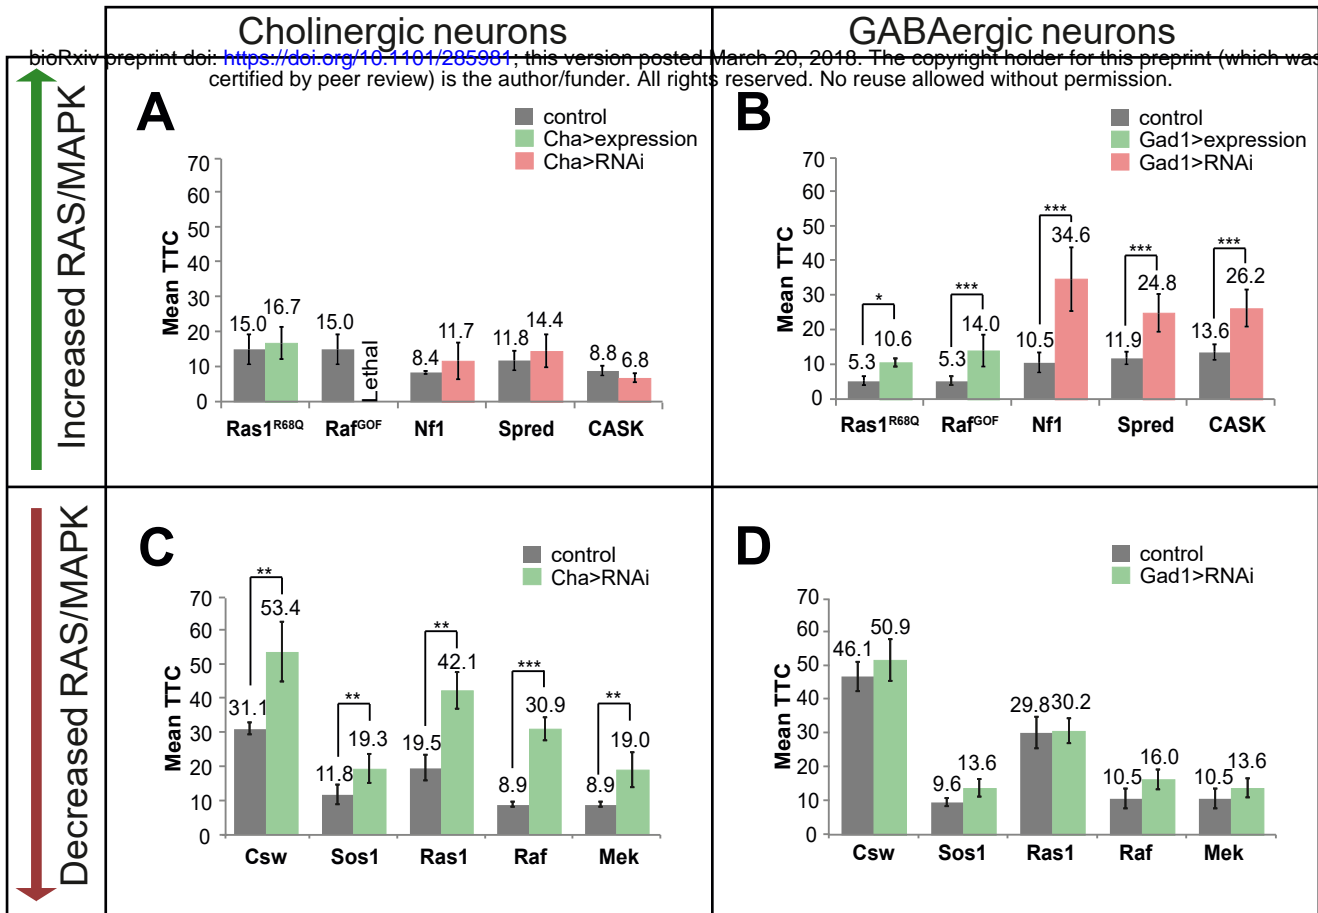

**Figure 6. Dual, opposing role of Ras-MAPK signaling in GABAergic and cholinergic neurons in the regulation of habituation learning**

(A) No effect on habituation of Ras1<sup>R68Q</sup> (N=51, in green), Nf1-RNAi (N=38, in red), Spred1-RNAi (N=55, in red) and CASK-RNAi (N=39, in red) upon expression in cholinergic neurons compared to their respective genetic background controls (Cha-Gal4/+; 2xGMR-wIR/+, N: 54, 45, 54, 52, in gray). Expression of Raf<sup>GOF</sup> in cholinergic neurons resulted in lethality. (B) Defective habituation of Ras1<sup>R68Q</sup> (N=52, in green), Raf<sup>GOF</sup> (N=57, in green), Nf1-RNAi (N=55, in red), Spred1-RNAi (N=37, in red) and CASK-RNAi (N=54, in red) on habituation upon expression in GABAergic neurons compared to their respective genetic background controls (Gad1-Gal4/+; 2xGMR-wIR/+, N: 50, 50, 39, 58, 46, in gray). (C) Defective habituation of Csw-RNAi (UAS-Csw-RNAi<sup>drc21756</sup>/Y; Cha-Gal4/+; 2xGMR-wIR/+, N=58), Sos1-RNAi (UAS-Sos1-RNAi<sup>drc42848</sup>/Cha-Gal4; 2xGMR-wIR/+, N=56), Ras1-RNAi (UAS-Ras1-RNAi<sup>drc106642</sup>/Cha-Gal4; 2xGMR-wIR/+, N=55), Raf-RNAi (UAS-Raf-RNAi<sup>drc20909</sup>/Cha-Gal4; 2xGMR-wIR/+, N=59) and Mek-RNAi (Cha-Gal4/+; UAS-Mek-RNAi<sup>drc40026</sup>/2xGMR-wIR, N=58) in cholinergic neurons (in green) compared to their respective genetic background controls (Cha-Gal4/+; 2xGMR-wIR/+, N: 62, 54, 34, 46, 46, in gray). (D) No effect on habituation of Csw-RNAi (N=58), Sos1-RNAi (N=51), Ras1-RNAi (N=53), Raf-RNAi (N=52) and Mek-RNAi (N=54) in GABAergic neurons (in green) compared to their respective genetic background controls (Gad1-Gal4/+; 2xGMR-wIR/+, N: 60, 46, 54, 39, 39, in gray). Data presented as Mean TTC ± SEM. \*\*\* p<0.001, \*\* p<0.01, \* p<0.05, based on lm analysis.

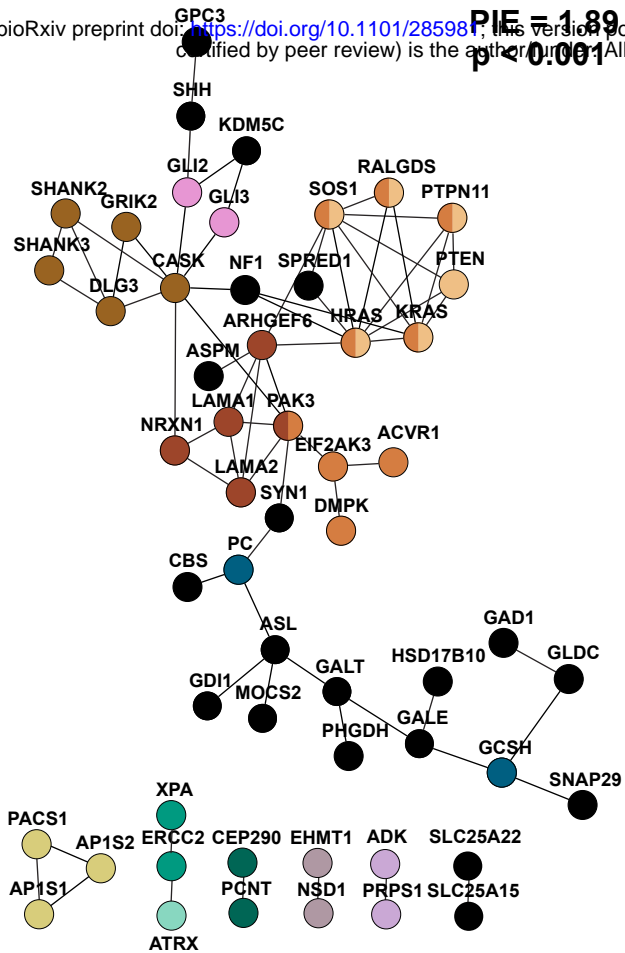

**Figure 7. Connections between “habituation deficient” genes**

Connections between “habituation deficient” genes, including Ras, identified in the reference network used for community clustering (See **SM**) with significantly increased connectivity (PIE score =1.89, p<0.001). Nodes are colored based on the community, to which they belong. Nodes that represent “habituation deficient” genes but are not members of a community are labeled in black.
