1 **Title:**

2 **A hundred genes implicated in intellectual disability and autism regulate habituation**  
3 **learning and reveal an opposing role for Ras-MAPK signaling in inhibitory and excitatory**  
4 **neurons**

5

6 **Short title:**

7 **Habituation Deficits in ID and ASD Models**

8 **Authors:**

9 Michaela Fenckova<sup>1</sup>, Laura E.R. Blok<sup>1</sup>, Lenke Asztalos<sup>2,3</sup>, David P. Goodman<sup>4</sup>, Pavel Cizek<sup>5</sup>, Euginia L.  
10 Singgih<sup>1,6</sup>, Jeffrey C. Glennon<sup>6</sup>, Joanna IntHout<sup>7</sup>, Christiane Zweier<sup>8</sup>, Evan E. Eichler<sup>9,10</sup>, Catherine R. von  
11 Reyn<sup>4,11</sup>, Raphael A. Bernier<sup>12</sup>, Zoltan Asztalos<sup>2,3,13</sup>, Annette Schenck<sup>1,\*</sup>

12

13 **Affiliations:**

14 <sup>1</sup>Department of Human Genetics, Donders Institute for Brain, Cognition and Behaviour, Radboud  
15 university medical center, 6525 GA, Nijmegen, the Netherlands

16 <sup>2</sup>Aktogen Ltd., Department of Genetics, University of Cambridge, CB2 3EH, Cambridge, United  
17 Kingdom. Current address: Unit 1 Highlode Industrial Estate, Stocking Fen Road, Ramsey, Huntingdon  
18 Cambridgeshire PE26 2RB, United Kingdom.

19 <sup>3</sup>Aktogen Hungary Ltd., Bay Zoltán Nonprofit Ltd. for Applied Research, Institute for Biotechnology  
20 (BAY-BIO), H-6726, Szeged, Hungary

21 <sup>4</sup>School of Biomedical Engineering, Science and Health Systems, Drexel University, 3141 Chestnut  
22 Street, Philadelphia, PA 19104, USA.

23 <sup>5</sup>Centre for Molecular and Biomolecular Informatics, Radboud Institute for Molecular Life Sciences,  
24 Radboud university medical center, Nijmegen, 6525 GA, the Netherlands

25 <sup>6</sup>Department of Cognitive Neuroscience, Donders Institute for Brain, Cognition and Behaviour,  
26 Radboud university medical center, 6525 EN, Nijmegen, the Netherlands

27 <sup>7</sup>Department for Health Evidence, Radboud university medical center, 6525 EZ, Nijmegen, The  
28 Netherlands

29 <sup>8</sup>Institute of Human Genetics, Friedrich-Alexander-Universität Erlangen-Nürnberg, 91054, Erlangen,  
30 Germany

31 <sup>9</sup>Department of Genome Sciences, University of Washington School of Medicine, Seattle, WA 98195,  
32 USA

33 <sup>10</sup>Howard Hughes Medical Institute, University of Washington, Seattle, WA 98195, USA

34 <sup>11</sup>Department of Neurobiology and Anatomy, Drexel School of Medicine, 2900 W. Queen Lane,  
35 Philadelphia, PA 19129, USA.

36 <sup>12</sup>Department of Psychiatry and Behavioral Sciences, University of Washington, Seattle, WA 98105,  
37 USA

38 <sup>13</sup>Institute of Biochemistry, Biological Research Centre, Hungarian Academy of Sciences, H-6726,  
39 Szeged, Hungary

40

41 **\*Corresponding author:**

42 Annette Schenck

43 Radboudumc

44 Dept. of Human Genetics

45 Geert Grooteplein 10

46 6525 GA, Nijmegen

47 The Netherlands

48 [Annette.Schenck@radboudumc.nl](mailto:Annette.Schenck@radboudumc.nl)

49 Tel: +31243610868

50

51 **Keywords:**

52 Habituation learning, Intellectual Disability, Autism Spectrum Disorder, *Drosophila*, Ras-MAPK,

53 GABAergic neurons

54

55 Number of words in abstract: 245

56 Number of words in the article body: 4000

57 Number of figures: 7

58 Number of tables: 0

59 Number of supplemental files: 5

60 **Abstract:**

61 **Background:** Although habituation is one of the most ancient and fundamental forms of learning, its  
62 regulators and relevance for human disease are poorly understood.

63 **Methods:** We manipulated the orthologs of 286 genes implicated in intellectual disability (ID) with or  
64 without comorbid autism spectrum disorder (ASD) specifically in *Drosophila* neurons, and tested  
65 these models in light-off jump habituation. We dissected neuronal substrates underlying the  
66 identified habituation deficits and integrated genotype-phenotype annotations, gene ontologies and  
67 interaction networks to determine the clinical features and molecular processes that are associated  
68 with habituation deficits.

69 **Results:** We identified more than 100 genes required for habituation learning. For the vast majority  
70 of these, 93 genes, a role in habituation learning was previously unknown. These genes characterize  
71 ID disorders with macrocephaly/overgrowth and comorbid ASD. Moreover, ASD individuals from the  
72 Simons Simplex Collection (SSC) carrying damaging *de novo* mutations in these genes exhibit  
73 increased aberrant behaviors associated with inappropriate, stereotypic speech. At the molecular  
74 level, ID genes required for normal habituation are enriched in synaptic function and converge on  
75 Ras-MAPK signaling. Both increased Ras-MAPK signaling in GABAergic and decreased Ras-MAPK  
76 signaling in cholinergic neurons specifically inhibit the adaptive habituation response.

77 **Conclusions:** Our work supports the relevance of habituation learning to autism, identifies an  
78 unprecedented number of novel habituation players, supports an emerging role for inhibitory  
79 neurons in habituation and reveals an opposing, circuit-level-based mechanism for Ras-MAPK  
80 signaling. This establishes habituation as a possible, widely applicable functional readout and target  
81 for pharmacologic intervention in ID/ASD.

82

83 **Introduction:**

84 Habituation is one of the most ancient and fundamental forms of learning, conserved across the  
85 animal kingdom (1). It causes an organism's initial response to repeated meaningless stimuli to  
86 gradually decline. Learning to ignore irrelevant stimuli as a result of habituation is thought to  
87 represent a filter mechanism that prevents information overload, allowing for selective attention,  
88 thereby focusing cognitive resources on relevant matters. Habituation learning has been proposed to  
89 represent an important prerequisite for higher cognitive functions (2–4). In line with this, habituation  
90 in infants correlates better than other measures with later cognitive abilities (5). However, key  
91 players and molecular mechanisms underlying habituation are poorly understood (6).

92 In humans, deficits in habituation have been reported in a number of neuropsychiatric and  
93 behavioral disorders. In particular, defective cortical filtering of sensory stimuli and information  
94 overload, as expected to arise from habituation deficits, are thought to represent mechanisms  
95 contributing to autism spectrum disorder (ASD) (7, 8). A decreased ability to habituate has been  
96 described in a fraction of ASD individuals (9–11), but has not been connected yet to specific genetic  
97 defects, with a single exception. Recently, two independent studies demonstrated habituation  
98 deficits in patients with Fragile X syndrome, the most common monogenic cause of intellectual  
99 disability (ID) and ASD (12, 13), confirming previously reported habituation deficits in *Fmr1* KO mice  
100 (14, 15). Habituation deficits have also been reported in a limited number of other ID or ASD  
101 (ID/ASD) disease models (16–19).

102 Because assessing human gene function in habituation is challenging, we utilized a cross-  
103 species approach. We apply light-off jump habituation in *Drosophila* to increase our knowledge on  
104 the genetic control of habituation and, at the same time, to address the relevance of decreased  
105 habituation in ID and in comorbid ASD disorders. Since ID is present in 70% of individuals with ASD  
106 (20), monogenic causes of ID provide a unique molecular windows to ASD pathology (21). *Drosophila*  
107 is a powerful, well-established model for ID (22–24) and offers genome-wide resources to study gene  
108 function in large scale (25, 26). Several forms of habituation have been established in *Drosophila* (27–

109 31). Deficits in light-off jump habituation have already been reported in several ID models (23, 32–  
110 36) and in classical learning and memory mutants (28, 31). Moreover, this form of habituation can be  
111 assessed in a high-throughput manner. In the light-off jump paradigm, the initial jump response to  
112 repeated light-off stimuli gradually wanes, as has been demonstrated not due to sensory adaptation  
113 (a decrease in detecting the stimulus) or motor fatigue (a decrease in the ability to execute the  
114 response) but as a result of learned adaptation of the startle circuit (31). This behavior meets all  
115 habituation criteria (37), including spontaneous recovery and dishabituation with a novel stimulus  
116 (31, 38).

117 Here, we use inducible RNA interference (RNAi) in *Drosophila* to systematically assess the  
118 role of *Drosophila* orthologs of 286 genes that are well-established to cause ID in humans when  
119 mutated (hereinafter referred to as ID genes). 68 of them (20%) have also been implicated in ASD  
120 (39, 40) (**Table S1**), hereinafter referred to as ID plus ASD-associated genes.

121

## 122 **Methods and Materials**

### 123 **Investigated ID genes**

124 A systematic source of ID genes and their *Drosophila* orthologs is available online (SysID database,  
125 [sysid.cmbi.umcn.nl](http://sysid.cmbi.umcn.nl) (41)). We investigated the *Drosophila* orthologs of 286 human ID genes from the  
126 SysID category primary ID genes (**Table S1**) (containing mutations with robust published evidence for  
127 causality, see **Supplemental Methods (SM)**). SysID inclusion criteria and in/exclusion criteria of  
128 experimentally investigated genes are indicated in the **SM**). In brief, the vast majority of genes are  
129 from the first data freeze of the SysID database (status of mid 2010). Genes have been included  
130 based on conservation in *Drosophila*, available tools (RNAi) from large-scale resources and viability as  
131 a prerequisite for behavioral testing. No selection was performed.

132

### 133 **Light-off jump habituation assay**

134 3- to 7-day-old flies were subjected to the light-off jump habituation paradigm in two independent  
135 16-unit light-off jump systems (manufactured and distributed by Aktogen Ltd.). After 5 min adaption,  
136 flies were simultaneously exposed to a series of 100 light-off pulses (15 ms) with 1 s interval. The  
137 noise amplitude of wing vibration during jump responses was recorded. An appropriate threshold  
138 (0.8 V) was applied to filter out background noise. Data were collected by a custom-made Labview  
139 Software (National Instruments). Flies were considered as habituated when not jumping in five  
140 consecutive light-off trials (no-jump criterion). Habituation was quantified as the number of trials  
141 required to reach the no-jump criterion (Trials To Criterion (TTC)).

142

143 Information about the identification of *Drosophila* orthologs, proposed disease mechanism,  
144 *Drosophila* stocks, phenotype reproducibility, validation of the automated jump scoring and of jump  
145 specificity, fatigue assay, quality criteria for RNAi lines, annotation of ID plus ASD associated genes,  
146 enrichment analysis, comparison of behavior and cognition in ASD individuals from the SSC,  
147 molecular interaction network, clustering, physical interaction enrichment (PIE), data visualization  
148 and statistics are described in the **SM**.

149

150 **Results:**

151

152 **Systematic identification of habituation deficits in *Drosophila* models of ID**

153 To identify novel genes implicated in habituation, we systematically investigated the role of 278  
154 *Drosophila* orthologs representing 286 human ID genes in the light-off jump habituation paradigm.  
155 We induced neuron-specific knockdowns of each ID gene ortholog by RNAi (25) using 513 RNAi lines  
156 fulfilling previously established quality criteria (41, 42), with two independent constructs per gene  
157 whenever available. These were crossed to the panneuronal elav-Gal4 driver line (see **SM**).  
158 Knockdown is a suitable approach for modeling of the here-investigated human disease conditions  
159 since (partial) loss of function is considered to be the underlying mechanism in the vast majority of  
160 these disorders (42) (**Table S1**). Restricting gene knockdown to neurons eliminates potential effects  
161 on viability or behavioral performance originating from an essential role of genes in other tissues and  
162 establishes neuron-autonomous mechanisms.

163 Knockdown and control flies of identical genetic background were subjected to a series of  
164 100 light-off stimuli, hereinafter referred to as trials, in the light-off jump habituation paradigm. The  
165 screening procedure and paradigm allowed us to distinguish the following parameters: viability,  
166 initial jump response (percentage of flies that jumped in at least one of the first five trials), and  
167 premature and reduced habituation, with the latter representing the learning-defective phenotype  
168 category of main interest. Genotypes with an initial jump response  $\geq 50\%$  but premature habituation  
169 were subjected to a secondary assay to exclude fatigue as a confounder of premature habituation  
170 (see **SM**, **Table S2** and **Figure S4**). Based on these parameters, genes were assigned to at least one of  
171 four phenotype categories (**Figure 1A**): (1) “not affected”: (both) tested RNAi lines targeting such  
172 genes were viable, showed good initial jump response, and had no significant effect on habituation  
173 (based on the FDR-corrected p-value ( $p_{adj}$ ), see **SM**); (2) “non-performers”: at least one RNAi line led  
174 to lethality, poor jump response ( $< 50\%$  initial jumpers), or premature habituation because of  
175 increased fatigue; (3) “habituation deficient”: at least one RNAi line showed good initial jump



176 response but failed to suppress the response with the increasing number of light-off trials (based on  
177  $p_{adj}$ ); and (4) “premature habituation”: at least one RNAi line showed good initial jump response  
178 followed by faster decline (based on  $p_{adj}$ ), without fatigue being detectable in the secondary assay.  
179 Still, this latter phenotype category can result from other defects than improved habituation, and will  
180 be investigated elsewhere. In this study we focus on habituation deficits (3), corresponding to the  
181 phenotype that has been shown in ID and ASD (9–13).

182 We validated the experimental approach to identify genes which, if manipulated, cause  
183 habituation deficits (hereinafter referred to as habituation deficient genes) by recapitulating  
184 published habituation deficits of *Drosophila* ID null mutant models *G9a* (23) and *Synapsin* (43), and of  
185 the classical learning and memory mutant *dunce* (28, 44, 45) (**Figure 1B,C,D**). This demonstrated that  
186 light-off jump habituation upon RNAi can efficiently identify genetic regulators of habituation  
187 learning. We also validated the technical accuracy of the automated jump scoring methodology by  
188 comparing automated and manually assessed jumping of controls and a number of ID models (**SM**,  
189 **Figure S1**).

190 In our screen, we found that the *Drosophila* orthologs of 98 human ID genes (35% of all  
191 investigated orthologs) are required, in neurons, for habituation learning. This phenotype represents  
192 a highly specific defect in behavioral adaptation to the stimulus; flies keep on jumping in response to  
193 the repetitive light-off stimulus, illustrating that they do not suffer from broad neuronal transmission  
194 deficits (which would disable jumping), fatigue, sensory or other deficiencies. No excessive  
195 locomotion was observed when handling the flies, and no stimulus hypersensitivity or random  
196 jumping was found (see **SM** and **Figure S2, S3** for validation of light-off jump habituation assay  
197 specificity). 27% of ID gene orthologs had no effect on habituation, 41% fell into the category of  
198 “non-performers”, and 8% showed “premature habituation” without detectable fatigue. The  
199 complete list of habituation screen results and distribution of human ID genes in phenotype  
200 categories can be found in **Table S2, S3**. The screen thus identified nearly a hundred orthologs of  
201 disease genes controlling habituation learning.

202

### 203 **Habituation deficits characterize ID genes with synaptic function**

204 We first asked whether genes characterized by habituation deficits in *Drosophila* converge on specific  
205 biological process. ID genes are known to be enriched in a number of biological processes, but which  
206 are important for habituation? Performing an enrichment analysis of ID-enriched Gene Ontology-  
207 based (GO) categories (see **SM**) against the background of the investigated ID genes, we found that  
208 “habituation deficient” genes are significantly enriched in a sole GO-based category: processes  
209 related to the synapse (22/44 ID genes,  $E=1.59$ ,  $p=0.024$ , **Figure 2, Table S4**). No enriched GO terms  
210 were found in the “not affected” category. Together, our results support synaptic processes to be  
211 crucial for habituation, as previously shown for other forms of this behavior (46, 47).

212

### 213 ***Drosophila* habituation deficits characterize ID genes associated with macrocephaly**

214 To understand whether habituation deficits in *Drosophila* represent a proxy of specific phenotypes in  
215 human individuals, we performed enrichment analysis among ID-associated clinical features (41). We  
216 found that orthologs of ID genes characterized by habituation deficits in *Drosophila* are specifically  
217 enriched among ID genes associated with macrocephaly/overgrowth (**Figure 3**,  $E=2.19$ ,  $p=0.018$ ,  
218 **Table S4**). In contrast, ID genes characterized as “non-performers” show enrichment in different,  
219 severe ID-associated features such as endocrine, limb and eye anomalies, brain malformations and  
220 obesity (**Figure S5, Table S4**). Moreover, ID genes not giving rise to habituation deficits (“not  
221 affected” category) did not show any enrichment among ID-associated clinical features (**Figure 3**,  
222 **Table S4**).

223

### 224 **Habituation deficits characterize ID genes associated with ASD and deficits in specific ASD-relevant** 225 **behavioral domains**

226 There is a long-known relationship between macrocephaly and autism (48). For this reason and  
227 because of the potential relevance of habituation deficits to ASD (9–11), we decided to further

228 investigate the relationship of *Drosophila* habituation and human ASD. We used the Simons Simplex  
229 Collection (SSC) (40), a genetically and phenotypically well-characterized cohort of sporadic ASD  
230 individuals. We matched genes with likely gene-disrupting (LGD) and likely damaging *de novo*  
231 mutations (49, 50) in this ASD cohort to those included in our experimental *Drosophila* habituation  
232 approach. 47 ASD individuals carried mutations in 33 of the investigated genes (**Table S5**). We first  
233 asked whether these ID plus ASD-associated genes preferentially fall into a specific *Drosophila*  
234 phenotype category. They are significantly enriched among the genes that in *Drosophila* caused  
235 habituation deficits (**Figure 4A**,  $E=1.64$ ,  $p=0.029$ , **Table S4**, ASD SSC). Independently, significant  
236 enrichment was obtained for high-confidence ID plus ASD-associated genes identified from the SFARI  
237 database (39) (38 investigated genes, **Figure 4B**,  $E=1.65$ ,  $p=0.016$ , **Table S4**, ASD SFARI), suggesting a  
238 relationship between *Drosophila* habituation deficits and human ASD.

239 To further characterize the relationship between *Drosophila* habituation and human  
240 phenotypes, we divided the SSC individuals into two distinct clusters based on their habituation  
241 phenotype in the corresponding fly models: habituation deficits (N=22 individuals, 17 genes) and no  
242 habituation deficits (N=12 individuals, 9 genes) (**Table S5**; another N=13 individuals, 7 genes fall into  
243 the non-informative phenotype groups “non-performers”/“premature habituation”). We compared  
244 both groups across five broad quantitative measures of behavior and cognition: cognitive ability (full-  
245 scale IQ); Social Responsiveness Scale (SRS); depression and anxiety (Child Behavior Checklist  
246 Internalizing Disorders, CBCL-Int); impulsivity, attention and conduct (Child Behavior Checklist  
247 Externalizing Disorders, CBCL-Ext); and atypical behavior (Aberrant Behavior Checklist, ABC). There  
248 was no significant difference for IQ ( $p=0.61$ ), SRS ( $p=0.62$ ), CBCL-Int ( $p=0.59$ ) or CBCL-Ext ( $p=0.37$ ),  
249 but a trend for ABC ( $p=0.04$ ; **Figure 4C**, **Table S6**). This effect is mainly driven by the ABC subdomain  
250 of inappropriate, stereotypic speech ( $p=0.0003$ ), not from the subdomains of irritability ( $p=0.1$ ),  
251 hyperactivity ( $p=0.86$ ), lethargy ( $p=0.54$ ) or stereotypy ( $p=0.91$ ) (**Table S6**). In summary, these data  
252 indicate that habituation deficits in *Drosophila* are relevant to ASD-implicated genes. They also  
253 suggest that SSC individuals carrying *de novo* mutations in genes associated with habituation deficits

254 in *Drosophila* show a higher rate and/or severity of atypical behaviors associated with inappropriate  
255 and stereotypic speech.

256

### 257 **Molecular networks and modules underlying habituation**

258 With the rich repertoire of nearly a hundred genes required for habituation that moreover show  
259 specificity for ASD and synapse function, we set out to determine the molecular pathways these  
260 genes are operating in. ID gene products are significantly interconnected via protein-protein  
261 interactions (51, 52). Consistent with previously published findings (41), ID genes investigated in our  
262 screen are 1.69 times enriched in interactions compared to 1000 randomly chosen protein sets of the  
263 same size and number of known interactions (physical interaction enrichment (PIE) score (53) =1.69;  
264  $p < 0.001$ ). To identify biologically relevant modules, we resolved this network into communities with  
265 even tighter interconnectivity using unsupervised community clustering (54). This analysis resulted in  
266 26 communities containing 109 proteins (**Figure 5A, Table S7**). Their proximity and specificity for ID-  
267 enriched GO-based processes are depicted in **Figure S6**. Mapping “habituation deficient” genes onto  
268 the communities (**Figure 5A, red circles**) highlighted modules with high incidence of habituation  
269 deficits (**Figure 5A**).

270

### 271 **A key role for ID and ASD-associated Ras signaling in habituation**

272 Five communities form a large, interconnected module with high incidences of habituation deficits.  
273 However, the tightly interconnected hub at its center is characterized by the absence of habituation  
274 deficits (**Figure 5A, square**). This hub represents the key proteins of Ras-MAPK signaling (**Figure 5B**).  
275 This pathway, best known for its role in cancer, underlies a group of disorders collectively referred as  
276 Rasopathies. Importantly, while 92% of the modeled ID disorders are thought to result from loss of  
277 function of the underlying genes, Rasopathies are caused by gain-of-function mutations in the core  
278 pathway (**Figure 5C, Table S1**). The utilized RNAi approach, despite addressing gene function, did  
279 thus not recapitulate the molecular pathology of these specific cognitive disorders. However,

280 Rasopathies can also result from loss of function in negative regulators of the pathway. We therefore  
281 asked whether the same genetic mechanisms that cause Rasopathies in humans also hold true for  
282 habituation deficits in *Drosophila*. In our screen, we tested habituation of two negative regulators of  
283 Ras: NF1 (*Drosophila* Nf1) (55) and SPRED1 (*Drosophila* Spred) (56, 57). Panneuronal knockdown of  
284 either regulator caused strong habituation deficits (**Figure 5D, in red**). We therefore tested a  
285 constitutively active *Ras* mutant, *Ras1<sup>R68Q</sup>* (58). Heterozygous *Ras1<sup>R68Q</sup>* flies showed strong  
286 habituation deficits compared to the control flies with the same genetic background ( $p=3.56 \times 10^{-9}$ ;  
287 **Figure 5D, in green**). The same was true when we overexpressed, specifically in neurons, *Ras1<sup>R68Q</sup>*  
288 allele from an inducible transgene ( $p=1.96 \times 10^{-6}$ ; **Figure 5D, in green**). We conclude that increased  
289 activity of Ras, causing Rasopathies and associated cognitive deficits in humans, causes habituation  
290 deficits in *Drosophila*.

291

### 292 **Habituation-inhibiting function of increased Ras-MAPK signaling maps to inhibitory/GABAergic** 293 **neurons**

294 We next aimed to identify in which type of neurons the habituation-inhibiting function of Ras-MAPK  
295 signaling resides. Because the well-characterized neurons of the giant fiber circuit controlling the  
296 light-off jump response are cholinergic (59), just as the majority of excitatory neurons in *Drosophila*,  
297 we first tested whether increased Ras-MAPK signaling activity would induce habituation deficits  
298 when directed to cholinergic neurons. For this, we adopted the knockdown of negative Ras  
299 regulators (*Nf1*, *Spred*), expressed constitutively active *Ras1* (*Ras1<sup>R68Q</sup>*), and tested expression of a  
300 gain-of-function allele of *Raf* (*Raf<sup>GOF</sup>*), a downstream mediator of Ras signaling. None of these, when  
301 driven by the cholinergic Cha-Gal4 driver, recapitulated the panneuronally evoked habituation  
302 deficits (**Figure 6A**).

303 Because of the recently established role of GABAergic neurons in *Drosophila* olfactory and  
304 proboscis extension reflex habituation (29, 60, 61) and the emerging importance of GABA inhibition  
305 in autism (62), we next targeted GABA neurons using the Gad1-Gal4 driver and the same toolbox.

306 This consistently induced habituation deficits in all tested conditions (**Figure 6B**). We conclude that  
307 the habituation-inhibiting function of increased Ras-MAPK signaling maps to GABAergic neurons.

308

309 **Ras-MAPK signaling in cholinergic neurons is essential for habituation learning**

310 Impaired jump response/increased fatigue associated with *Ras*, *Raf* and *Mek* knockdown in the  
311 screen could potentially mask an essential role for Ras signaling in habituation, in addition to the  
312 habituation-inhibiting function of increased Ras-MAPK signaling. In fact, our screen also identified  
313 habituation deficits upon RNAi of the positive Ras-MAPK regulators *Sos* and *Csw*. We therefore  
314 downregulated Ras-MAPK activity by crossing the UAS-based RNAi lines targeting *Sos* and *Csw*, but  
315 also RNAi lines targeting *Ras*, *Raf* and *Mek*, to the GABAergic driver *Gad1-Gal4*. We did not observe  
316 any detrimental effect on habituation (**Figure 6D**). In contrast, downregulating Ras-MAPK signaling in  
317 cholinergic neurons consistently prevented normal habituation learning (**Figure 6C**). We conclude  
318 that Ras-MAPK signaling is essential in cholinergic but not in GABAergic neurons. Thus, Ras-MAPK  
319 signaling plays a dual, opposing role in inhibitory versus excitatory neurons in habituation learning.

320

321 **Discussion:**

322 ***Drosophila* screen demonstrates that genes implicated in ASD are important for habituation**  
323 **learning**

324 To systematically address the genetic basis of habituation deficits associated with  
325 neurodevelopmental disorders, we investigated 286 ID genes with a clear *Drosophila* ortholog in  
326 light-off jump habituation. Panneuronal knockdown of the orthologs of 98 ID genes specifically  
327 suppressed the adaptive habituation response to repeated stimulation without affecting organismal  
328 health or jump ability. Follow-up work on the Ras-MAPK pathway raised this number to 104. 93 of  
329 these are novel regulators of habituation, substantially exceeding the sum of previously known  
330 regulators of habituation across species and paradigms. Stringent criteria for RNAi specificity and  
331 correction for multiple testing (see **SM**) in our experiments ensured a minimal level of potential false  
332 positive discoveries. Of thirteen previously identified ID genes with habituation deficits, our screen  
333 confirmed ten (**Table S8**). Our approach and data, although based on experiments in another species,  
334 suggest that deficits in habituation learning are a widely affected mechanism in ID. Habituation  
335 deficits might be a hallmark of even more ID genes than determined here. In particular, the  
336 phenotype category of “non-performers” is likely to contain genes with promiscuous functions  
337 masking a specific role in habituation learning.

338 Enrichment analysis of ID-associated clinical features revealed that “habituation deficient” ID  
339 genes are preferentially characterized by macrocephaly/overgrowth, associated for long with ASD  
340 (48). Strikingly, we found that mutations in genes associated with *Drosophila* habituation deficits are  
341 significantly overrepresented among ID genes that are also implicated in ASD (52% (SSC cohort); 53%  
342 (SFARI database)). In comparison the frequency of habituation deficits among ID genes not  
343 associated with ASD is 24%. SSC individuals carrying mutations in these genes show a high rate  
344 and/or severity of aberrant behaviors associated with stereotypic speech. Habituation deficits thus  
345 represent a common phenotypic signature of ASD in *Drosophila* and highlight specific behavioral

346 subdomains affected in ASD. Future work has to establish whether habituation deficits are a direct  
347 basis for these clinical features, or are one of many factors involved.

348

### 349 **Synapse-related processes and Ras-MAPK signaling play a key role in habituation**

350 Synapse biology has been proposed to play a central role in ASD (63). Our data show that among the  
351 investigated disease genes, “habituation deficient” genes are specifically enriched in genes with  
352 synaptic function. This is in line with habituation representing a measurable form of synaptic  
353 plasticity (7, 47, 64).

354 Analyzing the distribution of “habituation deficient” genes in ID-specific molecular  
355 interaction networks, we discovered that they accumulate in a multiple-community module and  
356 connect to the Ras-MAPK pathway core proteins Ras, Raf and Mek (**Figure 5A,B**). We observed  
357 habituation deficits upon panneuronal knockdown of Ras negative regulators and panneuronal  
358 expression of the constitutively active *Ras* allele *Ras1<sup>R68Q</sup>* (**Figure 5C**), demonstrating that increased  
359 Ras-mediated signaling causes habituation deficits. Moreover, proteins encoded by “habituation  
360 deficient” genes form a significantly interconnected module (**Figure 7**). The coherence of this module  
361 further supports the validity of the chosen RNAi approach to identify genes and molecular processes  
362 regulating habituation learning. The module contains a number of synaptic proteins (**Figure 7**) with  
363 not yet investigated roles in Ras signaling. It would be interesting to determine whether some of  
364 these enlarge the spectrum of diseases caused by deregulated Ras signaling.

365

### 366 **Ras-MAPK signaling exerts a dual but opposing role in inhibitory versus excitatory neurons, a novel 367 systems-level mechanism**

368 Identification of neuronal substrates in which specific ID genes are required to warrant habituation  
369 learning is important fundamental problem. Restoring the function of affected neurons might also  
370 represent a suitable treatment strategy. The light-off jump startle circuit of *Drosophila* is relatively  
371 simple and its cholinergic nature is well described (59). However, it is not known how habituation of



372 this circuit is regulated. The commonly accepted view regards synaptic depression in excitatory  
373 neurons, induced by repetitive stimulation, as the underlying mechanism (46, 65). This has recently  
374 been challenged by Ramaswami and colleagues who showed that plasticity of inhibitory, GABAergic  
375 neurons drives two non-startle types of habituation (60, 61). We found that increased activity of our  
376 identified key pathway, Ras-MAPK, in GABAergic but not in cholinergic neurons causes deficits in  
377 light-off jump habituation. Our results thus support inhibitory circuits as crucial components of  
378 habituation learning across different paradigms and sensory modalities. Further experiments are  
379 needed to establish the direct involvement of GABAergic signaling. At the same time, we identified  
380 that also decreased Ras-MAPK signaling activity can lead to habituation deficits. Yet, the neuronal  
381 substrates of these deficits are different and map to excitatory, cholinergic neurons. Although our  
382 experiments do not distinguish between developmental effects and acute circuit plasticity, the  
383 opposing role for Ras-MAPK signaling on habituation may provide new insights into mechanisms of  
384 neural plasticity in health and disease. It may also have crucial implications for treatment of  
385 Rasopathies. Future clinical trials, as opposed to those that broadly decreased Ras activity and failed  
386 (66), may need more attention towards restoring circuit function and balance.

387

### 388 **Translational value and application of cross-species habituation measures for diagnosis and** 389 **treatment of ID and ASD**

390 Based on our findings that habituation is widely affected in *Drosophila* models of ID, and that  
391 habituation deficits are particularly common among genes also implicated in ASD, we propose that  
392 disrupted habituation may be one of the mechanisms that contribute to ID/ASD pathology.

393 The emerging importance of inhibitory inputs for habituation ((29, 60) and this study) and  
394 sensory information filtering in the cortical centers of the brain (67, 68) suggests the existence of an  
395 overarching circuit-based mechanism responsible for prevention of inappropriate behavioral  
396 responses (7). Though our findings that habituation deficits in *Drosophila* correlate with increased  
397 rate and/or severity of atypical ASD-related behaviors compared to ID genes without habituation

398 deficits should be replicated, we speculate that disrupted habituation arising from GABAergic defects  
399 may contribute to these ASD features. If future work can establish a substantial contribution of  
400 deficits in habituation learning to patient outcomes, cross-species habituation could become an  
401 attractive mechanism-specific functional readout—a pressing need for efficient personalized  
402 (pharmacological) treatment in the field of neurodevelopmental disorders. Implementing suitable  
403 low-burden protocols for habituation measures in clinical research and diagnostics of ID/ASD, such as  
404 those developed for investigation of habituation deficits in Fragile X syndrome (12, 13), will help to  
405 further delineate the affected cognitive domains that may correlate with or arise from deficient  
406 habituation. In future clinical trials, these could serve as objective and quantitative readouts for  
407 patient stratification in mechanism-based treatment strategies and for monitoring of drug efficacy.  
408 Dissection of the underlying defective mechanisms in *Drosophila* can at the same time identify novel  
409 targets for treatment, with high-throughput light-off jump habituation serving as a translational  
410 pipeline for drug testing.

411

412 **Acknowledgements:**

413 We thank Dr Erika Virágh and Enikő Csapó (Biological Research Centre, Szeged, Hungary), moreover  
414 Dr Judit Bíró and Márk Péter-Szabó (Voalaz Ltd., Szeged, Hungary) for their contribution to the  
415 validation of the *Drosophila* semi-automated light-off jump reflex habituation paradigm. We  
416 acknowledge the Vienna *Drosophila* Resource Center and Bloomington *Drosophila* Stock Center (NIH  
417 P40OD018537) for providing *Drosophila* strains. We thank the anonymous expert referees for  
418 constructive feedback. This research was supported in part by the European Union's FP7 TACTICS,  
419 OPTIMISTIC, Aggressotype and MATRICS (HEALTH grant agreement numbers n°278948, n°305697,  
420 n°602805 and n°603016) to J.C.G., by a grant from the National Science Foundation (CBET-1747506)  
421 to C.R.v.R., by the FP7 large-scale integrated network Gencodys (HEALTH-241995) to Z.A. and A.S., by  
422 a TOP grant (912-12-109) from The Netherlands Organization for Scientific Research (NWO), by a  
423 Horizon 2020 Marie Skłodowska-Curie European Training Network grant (MiND, 643051), by a grant  
424 from the Jérôme Léjeune foundation, and by a grant awarded under the Australian National Health  
425 & Medical Research Council (NHMRC) Centre for Research Excellence Scheme (APP1117394) to A.S.,  
426 and by U.S. National Institute for Mental Health (NIMH) funding (R01MH101221 to E.E.E. &  
427 R01MH100047 to R.B.). E.E.E is an investigator of the Howard Hughes Medical Institute. We are  
428 grateful to all of the families at the participating Simons Simplex Collection (SSC) sites, as well as the  
429 principal investigators (A. Beaudet, R. Bernier, J. Constantino, E. Cook, E. Fombonne, D. Geschwind,  
430 R. Goin-Kochel, E. Hanson, D. Grice, A. Klin, D. Ledbetter, C. Lord, C. Martin, D. Martin, R. Maxim, J.  
431 Miles, O. Ousley, K. Pelphrey, B. Peterson, J. Piggot, C. Saulnier, M. State, W. Stone, J. Sutcliffe, C.  
432 Walsh, Z. Warren, E. Wijsman). We appreciate obtaining access to phenotypic data on SFARI Base.  
433 Approved researchers can obtain the SSC population dataset described in this study  
434 (<http://sfari.org/resources/simons-simplex-collection>) by applying at <https://base.sfari.org>.

435

436 **Financial disclosures:**

437 In the past 3 years, J.C.G. has acted as a consultant to Boehringer Ingelheim GmbH but is not an  
438 employee, stock- or share-holder of this company. He has no other financial or material support to  
439 declare, including expert testimony, patents and royalties. E.E.E. is on the scientific advisory board  
440 (SAB) of DNAnexus, Inc.. Z.A. is a director and shareholder of Aktogen Ltd.. L.A. is a director of  
441 Aktogen Ltd.. The commercial light-off jump habituation system was purchased from Aktogen Ltd..  
442 Aktogen Ltd. provided training of the personnel and ~ 150 experiments from the initial screen were  
443 performed at Aktogen Ltd. by M.F. and L.A.. M.F., L.R.B., D.P.G., P.C., E.L.S., J.I., C.Z., C.R.v.R, R.A.B.  
444 and A.S. declare that they have no conflict of interests.

445

446 **References:**

- 447 1. Peeke H (1973): *Habituation: Behavioral studies*. (Vol. 1), Academic Press.
- 448 2. Colombo J, Mitchell DW (2009): Infant visual habituation. *Neurobiol Learn Mem*. 92: 225–234.
- 449 3. Rankin CH, Abrams T, Barry RJ, Bhatnagar S, Clayton D, Colombo J, *et al.* (2009): Habituation Revisited: An Updated and  
450 Revised Description of the Behavioral Characteristics of Habituation. *Neurobiol Learn Mem*. 92: 135–138.
- 451 4. Barron HC, Vogels TP, Behrens TE, Ramaswami M (2017): Inhibitory engrams in perception and memory. *Proc Natl Acad*  
452 *Sci*. 201701812.
- 453 5. Kavšek M (2004): Predicting later IQ from infant visual habituation and dishabituation: A meta-analysis. *J Appl Dev*  
454 *Psychol*. 25.
- 455 6. Schmid S, Wilson DA, Rankin CH (2015): Habituation mechanisms and their importance for cognitive function. *Front*  
456 *Integr Neurosci*. 77: 419–450.
- 457 7. Ramaswami M (2014): Network plasticity in adaptive filtering and behavioral habituation. *Neuron*. 82.
- 458 8. Sinha P, Kjelgaard MM, Gandhi TK, Tsourides K, Cardinaux AL, Pantazis D, *et al.* (2014): Autism as a disorder of prediction.  
459 *Proc Natl Acad Sci*. 111: 15220–5.
- 460 9. Pellicano E, Rhodes G, Calder AJ (2013): Reduced gaze aftereffects are related to difficulties categorising gaze direction in  
461 children with autism. *Neuropsychologia*. 51: 1504–1509.
- 462 10. Ewbank MP, Rhodes G, Von Dem Hagen EAH, Powell TE, Bright N, Stoyanova RS, *et al.* (2015): Repetition suppression in  
463 ventral visual cortex is diminished as a function of increasing autistic traits. *Cereb Cortex*. 25: 3381–3393.
- 464 11. Swartz JR, Wiggins JL, Carrasco M, Lord C, Monk CS (2013): Amygdala habituation and prefrontal functional connectivity  
465 in youth with autism spectrum disorders. *J Am Acad Child Adolesc Psychiatry*. 52: 84–93.
- 466 12. Ethridge LE, White SP, Mosconi MW, Wang J, Byerly MJ, Sweeney JA (2016): Reduced habituation of auditory evoked  
467 potentials indicate cortical hyper-excitability in Fragile X Syndrome. *Transl Psychiatry*. 6: e787.
- 468 13. Rigoulot S, Knoth IS, Lafontaine M-P, Vannasing P, Major P, Jacquemont S, *et al.* (2017): Altered visual repetition  
469 suppression in Fragile X Syndrome: New evidence from ERPs and oscillatory activity. *Int J Dev Neurosci*. 59: 52–59.
- 470 14. Restivo L, Ferrari F, Passino E, Sgobio C, Bock J, Oostra BA, *et al.* (2005): Enriched environment promotes behavioral and

- 471 morphological recovery in a mouse model for the fragile X syndrome. *Proc Natl Acad Sci U S A*. 102: 11557–11562.
- 472 15. Lovelace JW, Wen TH, Reinhard S, Hsu MS, Sidhu H, Ethell IM, *et al.* (2016): Matrix metalloproteinase-9 deletion rescues  
473 auditory evoked potential habituation deficit in a mouse model of Fragile X Syndrome. *Neurobiol Dis*. 89: 126–135.
- 474 16. Wolman MA, deGroh ED, McBride SM, Jongens TA, Granato M, Epstein JA (2014): Modulation of cAMP and Ras  
475 Signaling Pathways Improves Distinct Behavioral Deficits in a Zebrafish Model of Neurofibromatosis Type 1. *Cell Rep*.  
476 8: 1265–1270.
- 477 17. Kirshenbaum GS, Clapcote SJ, Duffy S, Burgess CR, Petersen J, Jarowek KJ, *et al.* (2011): Mania-like behavior induced by  
478 genetic dysfunction of the neuron-specific Na<sup>+</sup>,K<sup>+</sup>-ATPase  $\alpha$ 3 sodium pump. *Proc Natl Acad Sci U S A*. 108: 18144–9.
- 479 18. Cheli VT, Adrover MF, Blanco C, Verde ER, Guyot-Revol V, Vidal R, *et al.* (2002): Gene transfer of NMDAR1 subunit  
480 sequences to the rat CNS using herpes simplex virus vectors interfered with habituation. *Cell Mol Neurobiol*. 22: 303–  
481 314.
- 482 19. Walsh J, Desbonnet L, Clarke N, Waddington JL, O’Tuathaigh CMP (2012): Disruption of exploratory and habituation  
483 behavior in mice with mutation of DISC1: An ethologically based analysis. *J Neurosci Res*. 90: 1445–1453.
- 484 20. Schwartz CE, Neri G (2012): Autism and intellectual disability: Two sides of the same coin. *Am J Med Genet Part C Semin*  
485 *Med Genet*. . doi: 10.1002/ajmg.c.31329.
- 486 21. Chahrouh M, O’Roak BJ, Santini E, Samaco RC, Kleiman RJ, Manzini MC (2016): Current Perspectives in Autism Spectrum  
487 Disorder: From Genes to Therapy. *J Neurosci*. 36: 11402–11410.
- 488 22. McBride SMJ, Choi CH, Wang Y, Liebelt D, Braunstein E, Ferreiro D, *et al.* (2005): Pharmacological rescue of synaptic  
489 plasticity, courtship behavior, and mushroom body defects in a Drosophila model of Fragile X syndrome. *Neuron*. 45:  
490 753–764.
- 491 23. Kramer JM, Kochinke K, Oortveld MAW, Marks H, Kramer D, de Jong EK, *et al.* (2011): Epigenetic regulation of learning  
492 and memory by Drosophila EHMT/G9a. *PLoS Biol*. 9. doi: 10.1371/journal.pbio.1000569.
- 493 24. van der Voet M, Nijhof B, Oortveld MAW, Schenck A (2014): Drosophila models of early onset cognitive disorders and  
494 their clinical applications. *Neurosci Biobehav Rev*. 46.
- 495 25. Dietzl G, Chen D, Schnorrer F, Su K-C, Barinova Y, Fellner M, *et al.* (2007): A genome-wide transgenic RNAi library for  
496 conditional gene inactivation in Drosophila. *Nature*. 448: 151–6.

- 497 26. Bellen HJ, Tong C, Tsuda H (2010): 100 years of Drosophila research and its impact on vertebrate neuroscience: a history  
498 lesson for the future. *Nat Rev Neurosci.* 11: 514–22.
- 499 27. Duerr JS, Quinn WG (1982): Three Drosophila mutations that block associative learning also affect habituation and  
500 sensitization. *Proc Natl Acad Sci U S A.* 79: 3646–3650.
- 501 28. Asztalos Z, Arora N, Tully T (2007): Olfactory Jump Reflex Habituation in Drosophila and Effects of Classical Conditioning  
502 Mutations. *J Neurogenet.* 21: 1–18.
- 503 29. Larkin A, Karak S, Priya R, Das A, Ayyub C, Ito K, *et al.* (2010): Central synaptic mechanisms underlie short-term olfactory  
504 habituation in Drosophila larvae. *Learn Mem.* 17: 645–653.
- 505 30. Acevedo SF, Froudarakis EI, Kanellopoulos A, Skoulakis EMC (2007): Protection from premature habituation requires  
506 functional mushroom bodies in Drosophila. *Learn Mem.* 14: 376–84.
- 507 31. Engel JE, Wu CF (1996): Altered habituation of an identified escape circuit in Drosophila memory mutants. *J Neurosci.*  
508 16: 3486–99.
- 509 32. van Bon BWM, Oortveld MAW, Nijtmans LG, Fenckova M, Nijhof B, Besseling J, *et al.* (2013): CEP89 is required for  
510 mitochondrial metabolism and neuronal function in man and fly. *Hum Mol Genet.* 22: 3138–3151.
- 511 33. Willemsen MH, Nijhof B, Fenckova M, Nillesen WM, H F Bongers EM, Castells-Nobau A, *et al.* (2013): GATAD2B loss-of-  
512 function mutations cause a recognisable syndrome with intellectual disability and are associated with learning  
513 deficits and synaptic undergrowth in Drosophila. *J Med Genet.* 50: 507–514.
- 514 34. Lugtenberg D, Reijnders MRF, Fenckova M, Bijlsma EK, Bernier R, van Bon BWM, *et al.* (2016): De novo loss-of-function  
515 mutations in WAC cause a recognizable intellectual disability syndrome and learning deficits in Drosophila. *Eur J Hum*  
516 *Genet.* 1–9.
- 517 35. Stessman HAF, Willemsen MH, Fenckova M, Penn O, Hoischen A, Xiong B, *et al.* (2016): Disruption of POGZ Is Associated  
518 with Intellectual Disability and Autism Spectrum Disorders. *Am J Hum Genet.* 98: 541–552.
- 519 36. Esmaeeli-Nieh S, Fenckova M, Porter IM, Motazacker MM, Nijhof B, Castells-Nobau A, *et al.* (2016): BOD1 Is Required  
520 for Cognitive Function in Humans and Drosophila. *PLoS Genet.* 12. doi: 10.1371/journal.pgen.1006022.
- 521 37. Rankin CH, Abrams T, Barry RJ, Bhatnagar S, Clayton D, Colombo J, *et al.* (2009): Habituation Revisited: An Updated and  
522 Revised Description of the Behavioral Characteristics of Habituation. *Neurobiol Learn Mem.* 92: 135–138.

- 523 38. Kelly LE (1983): An altered electroretinogram transient associated with an unusual jump response in a mutant of  
524 *Drosophila*. *Cell Mol Neurobiol.* 3: 143–9.
- 525 39. Basu SN, Kollu R, Banerjee-Basu S (2009): AutDB: A gene reference resource for autism research. *Nucleic Acids Res.* 37.  
526 doi: 10.1093/nar/gkn835.
- 527 40. Fischbach GD, Lord C (2010): The simons simplex collection: A resource for identification of autism genetic risk factors.  
528 *Neuron.* 68.
- 529 41. Kochinke K, Zweier C, Nijhof B, Fenckova M, Cizek P, Honti F, *et al.* (2016): Systematic Phenomics Analysis Deconvolutes  
530 Genes Mutated in Intellectual Disability into Biologically Coherent Modules. *Am J Hum Genet.* 98: 149–164.
- 531 42. Oortveld MAW, Keerthikumar S, Oti M, Nijhof B, Fernandes AC, Kochinke K, *et al.* (2013): Human Intellectual Disability  
532 Genes Form Conserved Functional Modules in *Drosophila*. *PLoS Genet.* 9. doi: 10.1371/journal.pgen.1003911.
- 533 43. Sadanandappa MK, Blanco Redondo B, Michels B, Rodrigues V, Gerber B, VijayRaghavan K, *et al.* (2013): Synapsin  
534 function in GABA-ergic interneurons is required for short-term olfactory habituation. *J Neurosci.* 33: 16576–85.
- 535 44. Dudai Y, Jan YN, Byers D, Quinn WG, Benzer S (1976): *dunce*, a mutant of *Drosophila* deficient in learning. *Proc Natl*  
536 *Acad Sci U S A.* 73: 1684–8.
- 537 45. Tempel BL, Bonini N, Dawson DR, Quinn WG (1983): Reward learning in normal and mutant *Drosophila*. *Proc Natl Acad*  
538 *Sci.* 80: 1482–1486.
- 539 46. Castellucci V, Pinsker H, Kupfermann I, Kandel ER (1970): Neuronal Mechanisms of Habituation and dishabituation of  
540 the gill withdrawal reflex in *Aplysia*. *Science (80- )*. 167: 1745–1748.
- 541 47. Poon C-S, Young DL (2006): Nonassociative learning as gated neural integrator and differentiator in stimulus-response  
542 pathways. *Behav Brain Funct.* 2: 29.
- 543 48. Lainhart JE, Piven J, Wzorek M, Landa R, Santangelo SL, Coon H, Folstein SE (1997): Macrocephaly in children and adults  
544 with autism. *J Am Acad Child Adolesc Psychiatry.* 36: 282–290.
- 545 49. Iossifov I, O’Roak BJ, Sanders SJ, Ronemus M, Krumm N, Levy D, *et al.* (2014): The contribution of de novo coding  
546 mutations to autism spectrum disorder. *Nature.* 513: 216–221.
- 547 50. Sanders SJ, He X, Willsey AJ, Ercan-Sencicek AG, Samocha KE, Cicek AE, *et al.* (2015): Insights into Autism Spectrum  
548 Disorder Genomic Architecture and Biology from 71 Risk Loci. *Neuron.* 87: 1215–1233.



- 549 51. Cristino a S, Williams SM, Hawi Z, An J-Y, Bellgrove M a, Schwartz CE, *et al.* (2014): Neurodevelopmental and  
550 neuropsychiatric disorders represent an interconnected molecular system. *Mol Psychiatry*. 19: 294–301.
- 551 52. Honti F, Meader S, Webber C (2014): Unbiased Functional Clustering of Gene Variants with a Phenotypic-Linkage  
552 Network. *PLoS Comput Biol*. 10. doi: 10.1371/journal.pcbi.1003815.
- 553 53. Sama IE, Huynen MA (2010): Measuring the physical cohesiveness of proteins using Physical Interaction Enrichment  
554 (PIE). *Bioinformatics*. 26: 2737–2743.
- 555 54. Kalinka AT, Tomancak P (2011): linkcomm: An R package for the generation, visualization, and analysis of link  
556 communities in networks of arbitrary size and type. *Bioinformatics*. 27: 2011–2012.
- 557 55. Martin GA, Viskochil D, Bollag G, McCabe PC, Crosier WJ, Haubruck H, *et al.* (1990): The GAP-related domain of the  
558 neurofibromatosis type 1 gene product interacts with ras p21. *Cell*. 63: 843–849.
- 559 56. Dunzendorfer-Matt T, Mercado EL, Maly K, McCormick F, Scheffzek K (2016): The neurofibromin recruitment factor  
560 Spred1 binds to the GAP related domain without affecting Ras inactivation. *Proc Natl Acad Sci*. 201607298.
- 561 57. Hirata Y, Brems H, Suzuki M, Kanamori M, Okada M, Morita R, *et al.* (2016): Interaction between a domain of the  
562 negative regulator of the ras-ERK pathway, SPRED1 protein, and the GTPase-activating protein-related domain of  
563 neurofibromin is implicated in legius syndrome and neurofibromatosis type 1. *J Biol Chem*. 291: 3124–3134.
- 564 58. Gafuik C, Steller H (2011): A gain-of-function germline mutation in drosophila ras1 affects apoptosis and cell fate during  
565 development. *PLoS One*. 6. doi: 10.1371/journal.pone.0023535.
- 566 59. Allen MJ, Murphey RK (2007): The chemical component of the mixed GF-TTMn synapse in *Drosophila melanogaster* uses  
567 acetylcholine as its neurotransmitter. *Eur J Neurosci*. 26: 439–445.
- 568 60. Das S, Sadanandappa MK, Dervan A, Larkin A, Lee JA, Sudhakaran IP, *et al.* (2011): Plasticity of local GABAergic  
569 interneurons drives olfactory habituation. *Proc Natl Acad Sci U S A*. 108: E646-54.
- 570 61. Paranjpe P, Rodrigues V, VijayRaghavan K, Ramaswami M (2012): Gustatory habituation in *Drosophila* relies on rutabaga  
571 (adenylate cyclase)-dependent plasticity of GABAergic inhibitory neurons. *Learn Mem*. 19: 627–635.
- 572 62. Robertson CE, Ratai EM, Kanwisher N (2016): Reduced GABAergic Action in the Autistic Brain. *Curr Biol*. 26: 80–85.
- 573 63. Bourgeron T (2015): From the genetic architecture to synaptic plasticity in autism spectrum disorder. *Nat Rev Neurosci*.  
574 16: 551–563.

- 575 64. Glanzman DL (2010): Common Mechanisms of Synaptic Plasticity in Vertebrates and Invertebrates. *Curr Biol.* 20. doi:  
576 10.1016/j.cub.2009.10.023.
- 577 65. Weber M, Schnitzler HU, Schmid S (2002): Synaptic plasticity in the acoustic startle pathway: The neuronal basis for  
578 short-term habituation? *Eur J Neurosci.* 16: 1325–1332.
- 579 66. van der Vaart T, Plasschaert E, Rietman AB, Renard M, Oostenbrink R, Vogels A, *et al.* (2013): Simvastatin for cognitive  
580 deficits and behavioural problems in patients with neurofibromatosis type 1 (NF1-SIMCODA): A randomised, placebo-  
581 controlled trial. *Lancet Neurol.* 12: 1076–1083.
- 582 67. Isaacson JS, Scanziani M (2011): How inhibition shapes cortical activity. *Neuron.* 72.
- 583 68. Geramita MA, Burton SD, Urban NN (2016): Distinct lateral inhibitory circuits drive parallel processing of sensory  
584 information in the mammalian olfactory bulb. *Elife.* 5. doi: 10.7554/eLife.16039.001.
- 585
- 586

587 **Figure legends:**

588 **Figure 1. Habituation screen of intellectual disability genes, phenotype distribution and proof of**  
589 **principle**

590 (A) Procedure, phenotype categories and phenotype distribution of the light-off jump habituation  
591 screen. Knockdowns that resulted in lethality, no jumper phenotype (defined as less than 50% flies  
592 jumping in at least one of the first five light-off trials) or premature habituation plus increased fatigue  
593 were assigned to the category “non-performers” and their habituation was not further analyzed.  
594 Other phenotype categories are “habituation deficient”, “not affected”, and “premature habituation”  
595 (the latter if no fatigue was detected in secondary assay, see example in **Figure S4**). *Drosophila*  
596 orthologs of 34% of the investigated human ID genes were associated with defects in habituation  
597 learning. See also **Table S2, S3**. (B, C, D) Defective habituation upon neuron-specific RNAi-mediated  
598 knockdown of *G9a*, *Synapsin (syn)*, and *dunce (dnc)* (*2xGMR-wIR/+; UAS-RNAi/elav-Gal4, UAS-Dicer-*  
599 *2*, in red) compared to their respective genetic background controls (*2xGMR-wIR/+; elav-Gal4, UAS-*  
600 *Dicer-2/+*, in gray). Jump response curves show the average jump response (% of jumping flies) over  
601 100 light-off trials at 1 s inter-trial interval). Mean TTC: the mean number of trials that flies needed to  
602 reach the no-jump criterion (see **Methods and Materials**) presented as Mean TTC  $\pm$  SEM. \*\*\*  
603  $p_{\text{adj}} < 0.001$ , \*\*  $p_{\text{adj}} < 0.01$ , based on FDR-corrected lm analysis. A complete list of ID genes with  
604 previously identified habituation defects is provided as **Table S8**, adding further proof of principle.

605

606 **Figure 2. Habituation deficits in *Drosophila* characterize ID genes with synapse-related functions**

607 Of 25 gene ontology (GO)-based processes, “habituation deficient” genes are specifically and  
608 significantly enriched in processes related to synapse ( $E=1.59$ ,  $p=0.024$ ). Genes with no effect on  
609 habituation do not show significant enrichment in any GO process. \*  $p < 0.05$ , based on Fisher’s exact  
610 test. All enrichment scores, p-values and enriched genes are listed in **Table S4**.

611

612 **Figure 3. Habituation deficits in *Drosophila* characterize ID genes associated with macrocephaly in**  
613 **humans**

614 Enrichment of *Drosophila* phenotype categories across 27 ID-accompanying clinical features (41).  
615 “Habituation deficient” genes show specificity for macrocephaly and/or overgrowth ( $E=2.19$ ,  
616  $p=0.018$ ) \*\*  $p<0.01$ , \*  $p<0.05$ , based on Fisher’s Exact test. For enrichment among the “non-  
617 performers” category, see **Figure S5**. Enrichment scores, p-values and enriched genes are listed in  
618 **Table S4**.

619

620 **Figure 4. Habituation deficits in *Drosophila* characterize ID genes associated with ASD and deficits**  
621 **in specific behavioral domains**

622 (A,B) Enrichment of *Drosophila* phenotype categories “habituation deficient” and “not affected” in ID  
623 plus ASD-associated genes identified in SFARI database (ASD SFARI,  $E=1.65$ ,  $p=0.016$ , (A)) and SSC  
624 cohort (ASD SSC,  $E=1.64$ ,  $p=0.029$  (B)). Circles represent total number of tested ID plus ASD-  
625 associated genes. (C) Genes associated with “habituation deficient” versus “not affected” phenotype  
626 categories in *Drosophila* show tendency for more aberrant behaviors on the ABC ( $p=0.04$ ) in the ASD  
627 SSC cohort. Data presented as mean score  $\pm$  SEM. \*  $p<0.05$ , based on MANOVA. See also **Table S5**  
628 (list of ASD SSC and ASD SFARI genes) and **Table S6** (complete MANOVA results).

629

630 **Figure 5. A central role for Ras-MAPK signaling in habituation learning**

631 (A) Highly connected communities identified by unbiased community clustering, colored by their  
632 functional proximity (**Figure S6**). Red circles and gene names highlight nodes representing  
633 “habituation deficient” genes. For complete list of communities and genes see **Table S7**. (B) Nodes  
634 connecting four communities from the central module represent the core components of Ras-MAPK  
635 signaling. (C) Schematic representation of Ras-MAPK signaling and associated mechanisms in ID  
636 disorders called ‘Rasopathies’. (D) Increasing Ras signaling by inducing either loss of function of  
637 negative Ras regulators (left side of pathway scheme) or by constitutively activating Ras (right side)

638 disrupts habituation learning. Left: Defective habituation upon neuron-specific knockdown of  
639 negative Ras regulators, *Nf1* ( $2xGMR-wIR/+; Nf1-RNAi^{vdrC35877}/elav-Gal4, UAS-Dicer-2$ , N=72, in red)  
640 and *Spred* ( $2xGMR-wIR/+; Spred-RNAi^{vdrC18024}/elav-Gal4, UAS-Dicer-2$ , N=73, in red), compared to  
641 their corresponding genetic background controls ( $2xGMR-wIR/+; elav-Gal4, UAS-Dicer-2/+$ . N: 55, 20,  
642 in gray). \*\*\*  $p_{adj} < 0.001$ , based on lm analysis and FDR correction in the screen (see **Methods and**  
643 **Materials**). Right: Defects in habituation learning in a heterozygous, constitutively active *Ras* mutant  
644 ( $Ras1^{R68Q/+}$ , N=55, in green) compared to its genetic background control (N=43 in gray), and upon  
645 neuron-specific expression of *Ras1<sup>R68Q</sup>* ( $elav>Ras1^{R68Q}; UAS-Ras1^{R68Q}/2xGMR-wIR; elav-Gal4, UAS-$   
646  $Dicer-2/+$ , N=52, in green) compared to its genetic background control ( $2xGMR-wIR/+; elav-Gal4,$   
647  $UAS-Dicer-2/+$ , N=34, in gray). \*\*\*  $p < 0.001$ , based on lm analysis. Data presented as Mean TTC  $\pm$   
648 SEM.

649

650 **Figure 6. Dual, opposing role of Ras-MAPK signaling in GABAergic and cholinergic neurons in the**  
651 **regulation of habituation learning**

652 (A) No effect on habituation of *Ras1<sup>R68Q</sup>* (N=51, in green), *Nf1-RNAi* (N=38, in red), and *Spred-RNAi*  
653 (N=55, in red) upon expression in cholinergic neurons compared to their respective genetic  
654 background controls ( $Cha-Gal4/+; 2xGMR-wIR/+$ , N: 54, 45, 54 in gray). Expression of *Raf<sup>GOF</sup>* in  
655 cholinergic neurons resulted in lethality. (B) Defective habituation of *Ras1<sup>R68Q</sup>* (N=52, in green), *Raf<sup>GOF</sup>*  
656 (N=57, in green), *Nf1-RNAi* (N=55, in red), and *Spred-RNAi* (N=37, in red) on habituation upon  
657 expression in GABAergic neurons compared to their respective genetic background controls ( $Gad1-$   
658  $Gal4/+; 2xGMR-wIR/+$ , N: 50, 50, 39, 58 in gray). (C) Defective habituation of *Csw-RNAi* ( $UAS-Csw-$   
659  $RNAi^{vdrC21756}/Y; Cha-Gal4/+; 2xGMR-wIR/+$ , N=58), *Sos1-RNAi* ( $UAS-Sos1-RNAi^{vdrC42848}/Cha-Gal4;$   
660  $2xGMR-wIR/+$ , N=56), *Ras1-RNAi* ( $UAS-Ras1-RNAi^{vdrC106642}/Cha-Gal4; 2xGMR-wIR/+$ , N=55), *Raf-RNAi*  
661 ( $UAS-Raf-RNAi^{vdrC20909}/Cha-Gal4; 2xGMR-wIR/+$ , N=59) and *Mek-RNAi* ( $Cha-Gal4/+; UAS-Mek-$   
662  $RNAi^{vdrC40026}/2xGMR-wIR$ , N=58) in cholinergic neurons (in green) compared to their respective  
663 genetic background controls ( $Cha-Gal4/+; 2xGMR-wIR/+$ , N: 62, 54, 34, 46, 46, in gray). (D) No effect

664 on habituation of *Csw-RNAi* (N=58), *Sos1-RNAi* (N=51), *Ras1-RNAi* (N=53), *Raf-RNAi* (N=52) and *Mek-*  
665 *RNAi* (N=54) in GABAergic neurons (in green) compared to their respective genetic background  
666 controls (*Gad1-Gal4/+; 2xGMR-wIR/+*, N: 60, 46, 54, 39, 39, in gray). Data presented as Mean TTC  $\pm$   
667 SEM. \*\*\*  $p < 0.001$ , \*\*  $p < 0.01$ , \*  $p < 0.05$ , based on lm analysis.

668

669 **Figure 7. Connections between “habituation deficient” genes**

670 Connections between “habituation deficient” genes, including *Ras*, identified in the reference  
671 network used for community clustering (See **SM**) with significantly increased connectivity (PIE  
672 score=1.89,  $p < 0.001$ ). Nodes are colored based on the community to which they belong. Nodes that  
673 represent “habituation deficient” genes but are not members of a community are labeled in black.

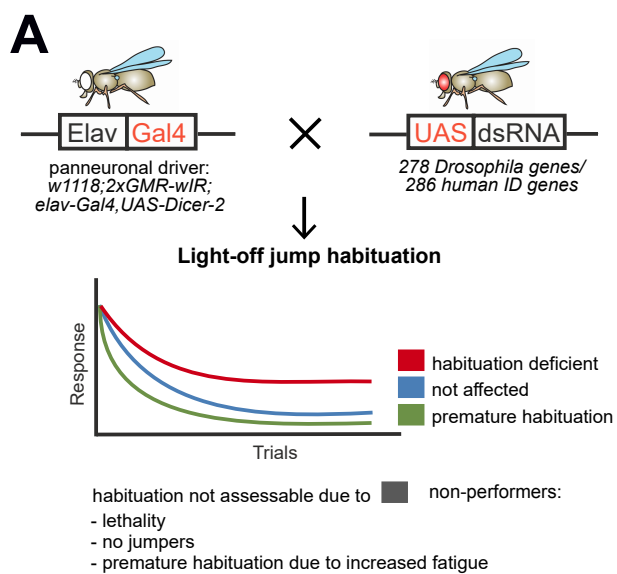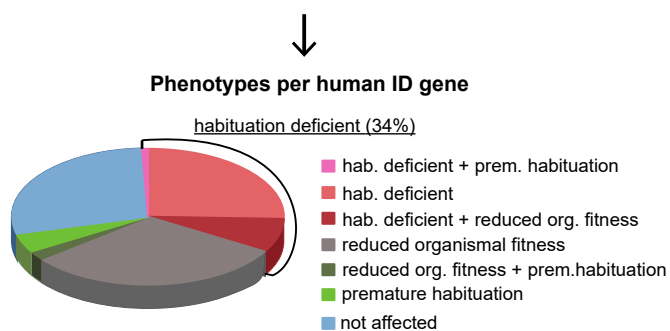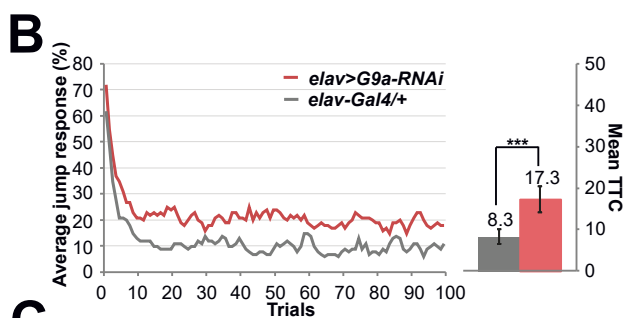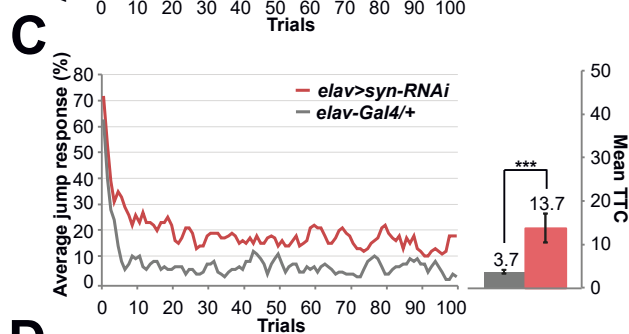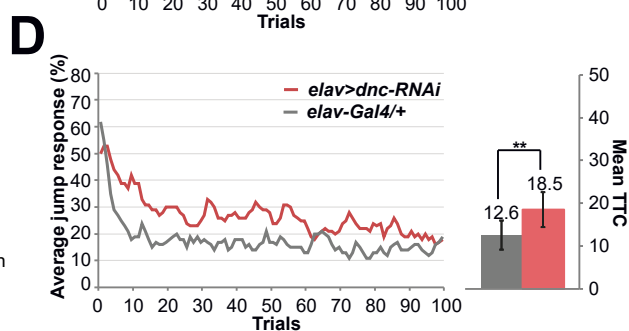

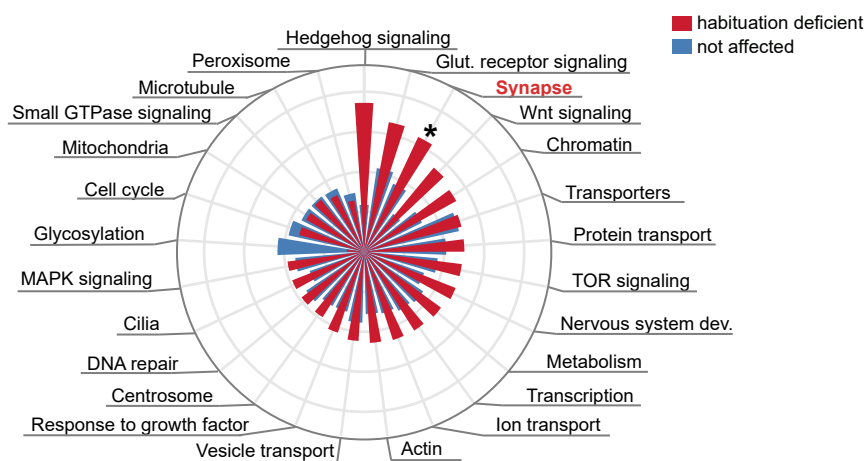



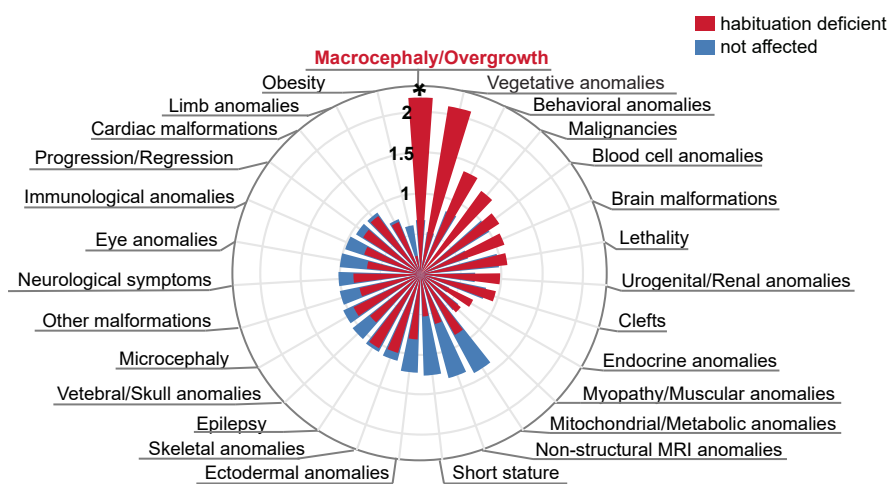

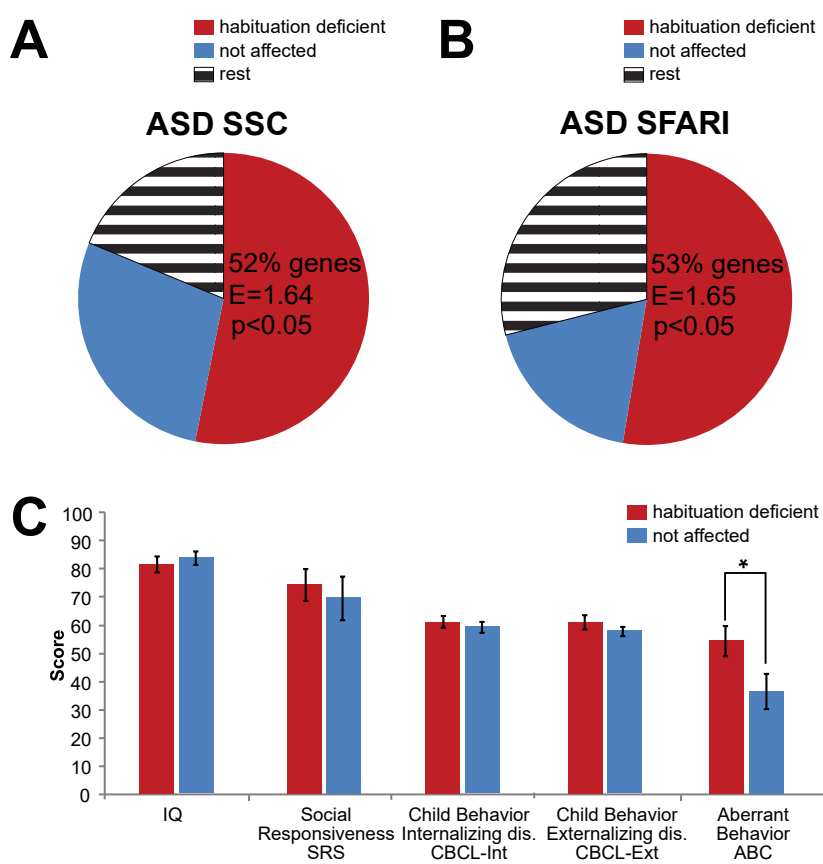

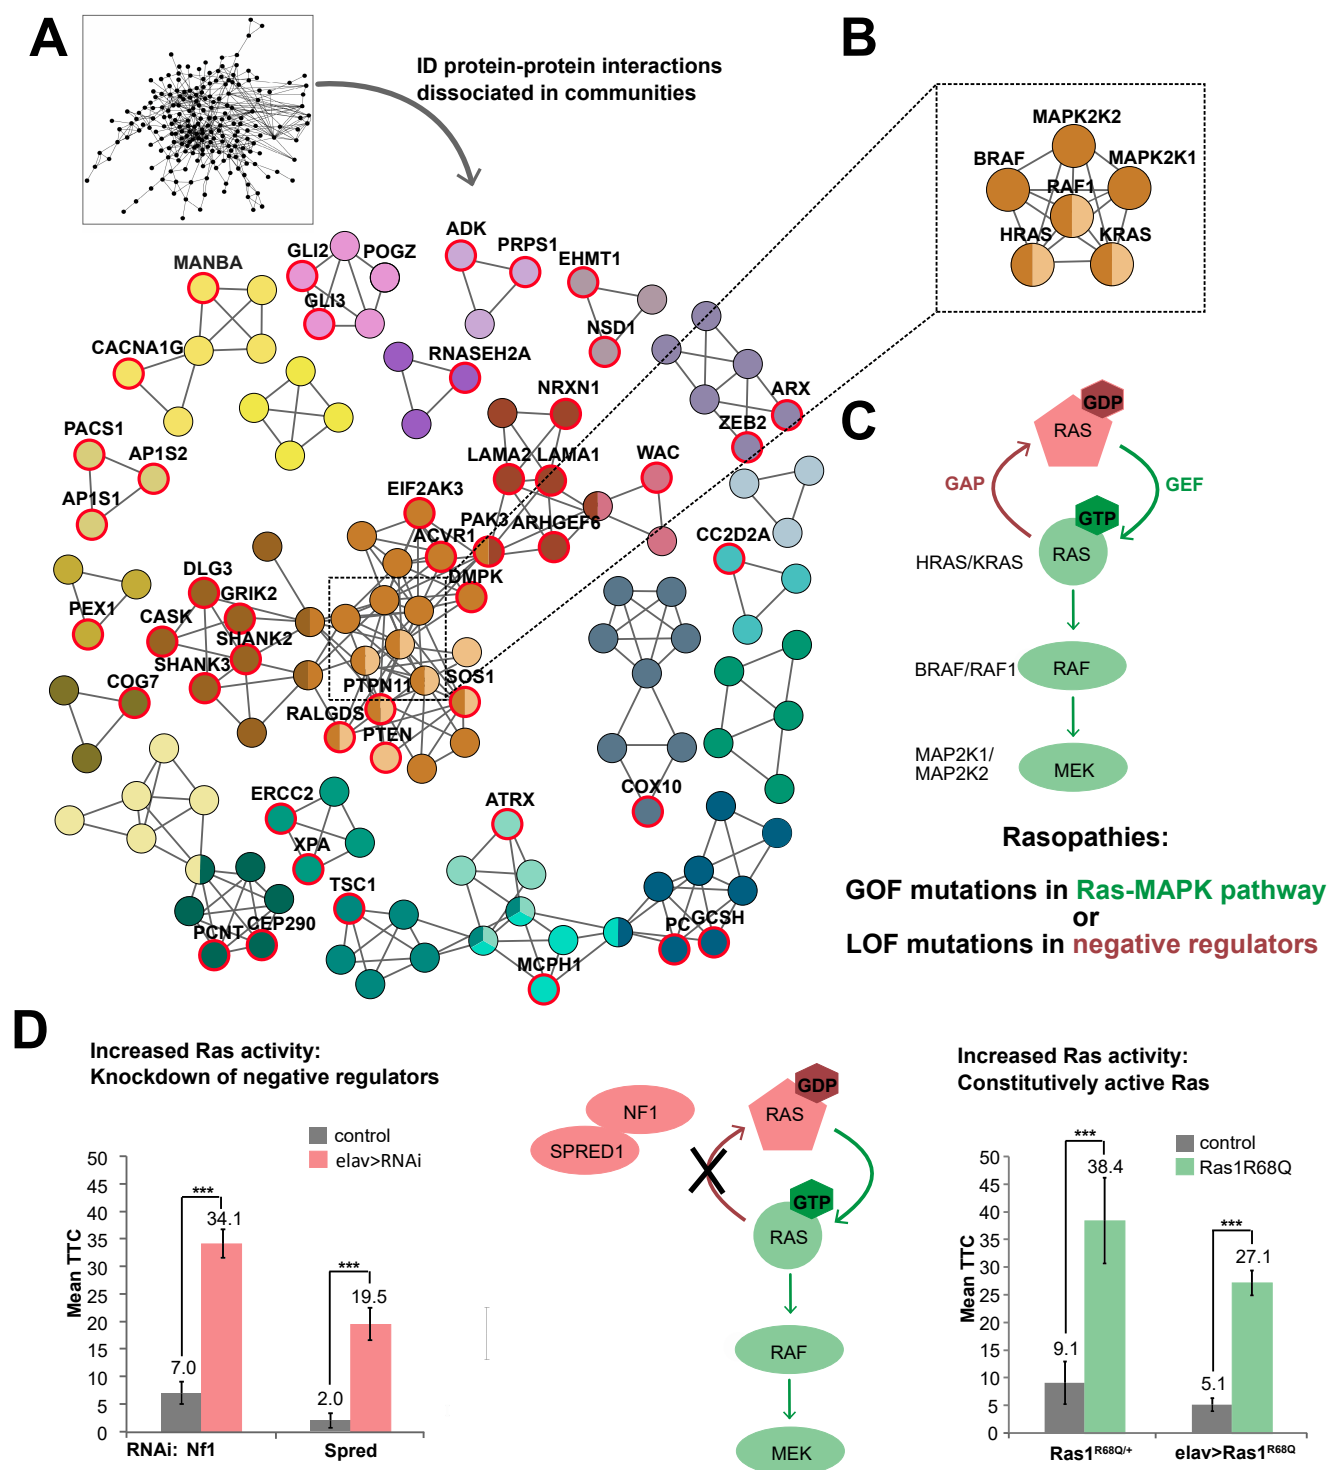

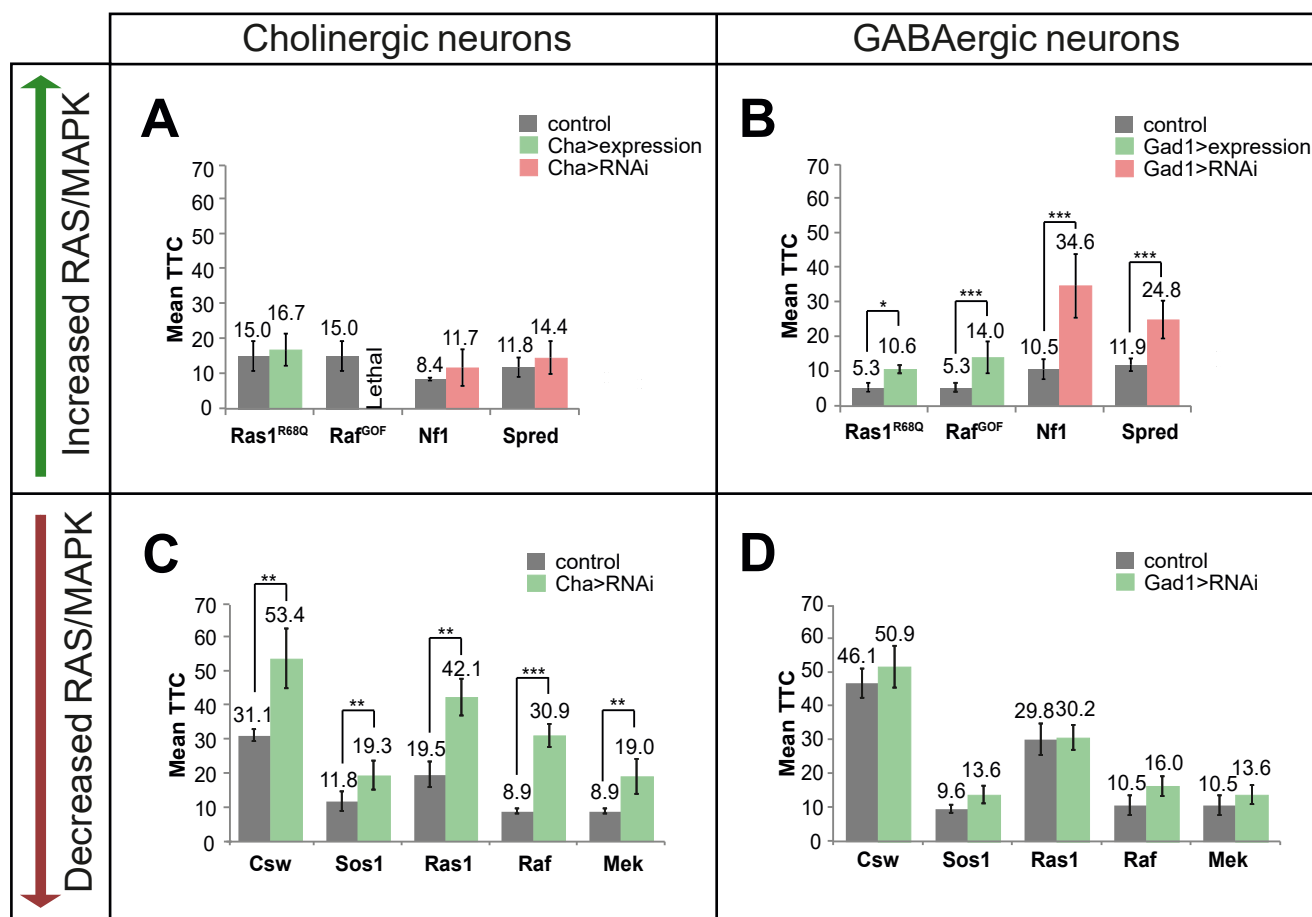

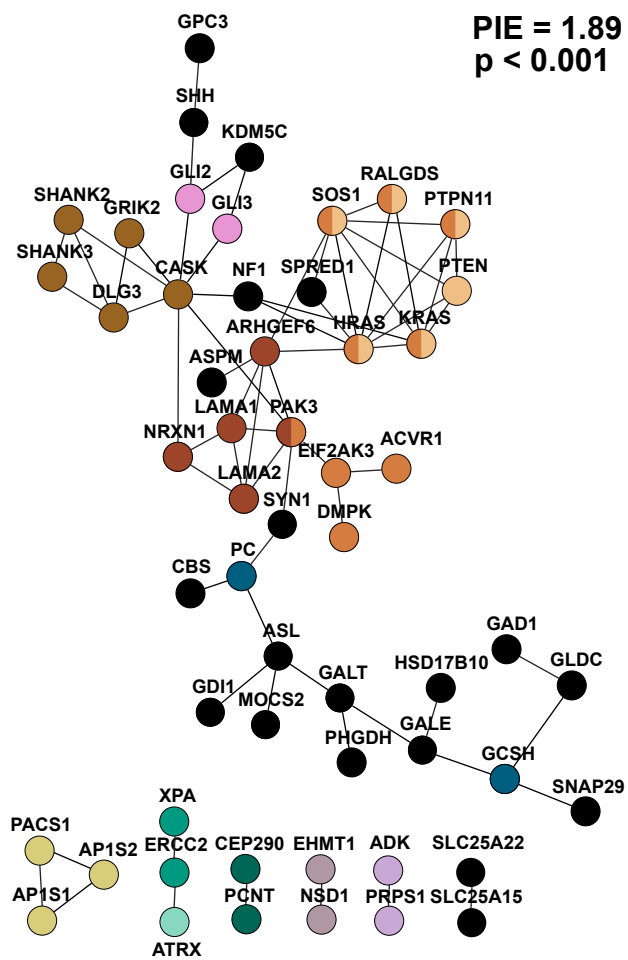

Source: https://www.biorxiv.org/content/10.1101/285981v4.full.pdf
